# Supplementary material
Source: ML conference proceedings conference paper supplement (https://proceedings.neurips.cc/paper_files/paper/2018/hash/1bc2029a8851ad344a8d503930dfd7f7-Abstract.html)
Supplement: Supplementary file [file 1bc2029a8851ad344a8d503930dfd7f7-Supplemental.zip]

## 5 Appendix A: Results for Main Theorem

**Notation.** Let  $(\cdot)^\top$  denote the real transpose. Let  $[n] = \{1, \dots, n\}$ . Let  $\mathcal{B}(x, r)$  denote the Euclidean ball centered at  $x$  with radius  $r$ . Let  $\|\cdot\|$  denote the  $\ell_2$  norm for vectors and spectral norm for matrices. For any non-zero  $x \in \mathbb{R}^n$ , let  $\hat{x} = x/\|x\|$ . Let  $\Pi_{i=d}^1 W_i = W_d W_{d-1} \dots W_1$ . Let  $I_n$  be the  $n \times n$  identity matrix. Let  $\mathcal{S}^{k-1}$  denote the unit sphere in  $\mathbb{R}^k$ . We write  $c = \Omega(\delta)$  when  $c \geq C\delta$  for some positive constant  $C$ . Similarly, we write  $c = O(\delta)$  when  $c \leq C\delta$  for some positive constant  $C$ . When we say that a constant depends polynomially on  $\epsilon^{-1}$ , this means that it is at least  $C\epsilon^{-k}$  for some positive  $C$  and positive integer  $k$ . For notational convenience, we write  $a = b + O_1(\epsilon)$  if  $\|a - b\| \leq \epsilon$  where  $\|\cdot\|$  denotes  $|\cdot|$  for scalars,  $\ell_2$  norm for vectors, and spectral norm for matrices. Define  $\text{sgn} : \mathbb{R} \rightarrow \mathbb{R}$  to be  $\text{sgn}(x) = x/|x|$  for non-zero  $x \in \mathbb{R}$  and  $\text{sgn}(x) = 0$  otherwise. For a vector  $v \in \mathbb{R}^n$ ,  $\text{diag}(\text{sgn}(v))$  is  $\text{sgn}(v_i)$  in the  $i$ -th diagonal entry and  $\text{diag}(v > 0)$  is 1 in the  $i$ -th diagonal entry if  $v_i > 0$  and 0 otherwise. For non-zero  $x, x_0 \in \mathbb{R}^k$ , let  $\theta_0 = \angle(x, x_0)$ . To understand how the map  $x \mapsto \text{relu}(Wx)$  distorts angles in expectation, define  $g : \mathbb{R} \rightarrow \mathbb{R}$  by

$$g(\theta) = \cos^{-1} \left( \frac{\cos \theta (\pi - \theta) + \sin \theta}{\pi} \right).$$

Then for  $i \geq 1$ , set  $\bar{\theta}_i = g(\bar{\theta}_{i-1})$  where  $\bar{\theta}_0 = \theta_0$ . Let  $g^{\circ d}$  denote the composition of  $g$  with itself  $d$  times. In this section,  $L$  is the positive universal constant  $3 + 88/\pi$ .<sup>4</sup>

### 5.1 Full proof of Theorem 3

*Proof.* Set

$$v_{x, x_0} = \begin{cases} \nabla f(x) & f \text{ is differentiable at } x \in \mathbb{R}^k \\ \lim_{\delta \rightarrow 0^+} \nabla f(x + \delta w) & \text{otherwise,} \end{cases}$$

where  $f$  is differentiable at  $x + \delta w$  for sufficiently small  $\delta > 0$ . Any such direction  $w$  can be chosen arbitrarily. Recall that

$$\nabla f(x) = (\Pi_{i=d}^1 W_{i,+}, x)^\top A_{G(x)}^\top A_{G(x)} (\Pi_{i=d}^1 W_{i,+}, x) - (\Pi_{i=d}^1 W_{i,+}, x)^\top A_{G(x)}^\top A_{G(x_0)} (\Pi_{i=d}^1 W_{i,+}, x_0) x_0.$$

Let

$$\bar{v}_{x, x_0} := (\Pi_{i=d}^1 W_{i,+}, x)^\top (\Pi_{i=d}^1 W_{i,+}, x) x - (\Pi_{i=d}^1 W_{i,+}, x)^\top \Phi_{G(x), G(x_0)} (\Pi_{i=d}^1 W_{i,+}, x_0) x_0, \quad (5)$$

$$h_{x, x_0} := -\frac{\|x_0\|}{2^d} \left( \frac{\pi - 2\bar{\theta}_d}{\pi} \right) \left( \prod_{i=0}^{d-1} \frac{\pi - \bar{\theta}_i}{\pi} \right) \hat{x}_0 \quad (6)$$

$$+ \frac{1}{2^d} \left[ \|x\| - \|x_0\| \left( \frac{2 \sin \bar{\theta}_d}{\pi} + \left( \frac{\pi - 2\bar{\theta}_d}{\pi} \right) \sum_{i=0}^{d-1} \frac{\sin \bar{\theta}_i}{\pi} \left( \prod_{j=i+1}^{d-1} \frac{\pi - \bar{\theta}_j}{\pi} \right) \right) \right] \hat{x}, \quad (7)$$

and

$$S_{\epsilon, x_0} := \left\{ x \in \mathbb{R}^k \setminus \{0\} : \|h_{x, x_0}\| \leq \frac{1}{2^d} \epsilon \max(\|x\|, \|x_0\|) \right\}.$$

First, observe that by the WDC, we have that for all  $x \neq 0$  and  $i = 1, \dots, d$ ,

$$\left\| W_{i,+}, x^\top W_{i,+}, x - \frac{1}{2} I_{n_i} \right\| \leq \epsilon \implies \|W_{i,+}, x\|^2 \leq \frac{1}{2} + \epsilon. \quad (8)$$

Observe that

$$\begin{aligned} \|\nabla f(x) - \bar{v}_{x, x_0}\| &\leq \left\| (\Pi_{i=d}^1 W_{i,+}, x)^\top (A_{G(x)}^\top A_{G(x)} - I_{n_d}) (\Pi_{i=d}^1 W_{i,+}, x) x \right\| \\ &\quad + \left\| (\Pi_{i=d}^1 W_{i,+}, x)^\top (A_{G(x)}^\top A_{G(x_0)} - \Phi_{G(x), G(x_0)}) (\Pi_{i=d}^1 W_{i,+}, x_0) x_0 \right\|. \end{aligned}$$

<sup>4</sup>This is the precise constant in the upper bound for the RRCP. Please see the proof of Proposition 5 for its derivation.

Hence by the RRCP (Proposition 6) and (8), we have that

$$\|\nabla f(x) - \bar{v}_{x,x_0}\| \leq L\epsilon \left( \prod_{i=1}^d \|W_{i,+x}\|^2 + \prod_{i=1}^d \|W_{i,+x}\| \|W_{i,+x_0}\| \right) \max(\|x\|, \|x_0\|) \quad (9)$$

$$\leq 2L\epsilon \left( \frac{1}{2} + \epsilon \right)^d \max(\|x\|, \|x_0\|). \quad (10)$$

Then Lemma 2 guarantees that for all non-zero  $x, x_0 \in \mathbb{R}^k$ ,

$$\|\bar{v}_{x,x_0} - h_{x,x_0}\| \leq 78 \frac{d^3}{2^d} \sqrt{\epsilon} \max(\|x\|, \|x_0\|). \quad (11)$$

Then we have that for all non-zero  $x, x_0 \in \mathbb{R}^k$ ,

$$\begin{aligned} \|v_{x,x_0} - h_{x,x_0}\| &= \lim_{\delta \rightarrow 0^+} \|\nabla f(x + \delta w) - h_{x+\delta w, x_0}\| \\ &\leq \lim_{\delta \rightarrow 0^+} (\|\nabla f(x + \delta w) - \bar{v}_{x+\delta w, x_0}\| + \|\bar{v}_{x+\delta w, x_0} - h_{x+\delta w, x_0}\|) \\ &\leq \sqrt{\epsilon} \left( 2L \frac{(1+2\epsilon)^d}{2^d} + 78 \frac{d^3}{2^d} \right) \max(\|x\|, \|x_0\|) \\ &\leq \sqrt{\epsilon} K \frac{d^3}{2^d} \max(\|x\|, \|x_0\|) \end{aligned}$$

for some universal constant  $K$  where the first equality follows by the definition of  $v_{x,x_0}$  and the continuity of  $h_{x,x_0}$  for non-zero  $x, x_0$ . The second inequality combines (10) and (11) and since  $2\epsilon d \leq 1 \implies (1+2\epsilon)^d \leq e^{2\epsilon d} \leq 1+4\epsilon d$ . This establishes concentration of  $v_{x,x_0}$  to  $h_{x,x_0}$  for all non-zero  $x, x_0 \in \mathbb{R}^k$ :

$$\|v_{x,x_0} - h_{x,x_0}\| \leq \sqrt{\epsilon} K \frac{d^3}{2^d} \max(\|x\|, \|x_0\|) \quad (12)$$

Now, due to the continuity and piecewise linearity of the function  $G(x)$  and  $|\cdot|$ , we have that for any  $x, y \neq 0$  that there exists a sequence  $\{x_n\} \rightarrow x$  such that  $f$  is differentiable at each  $x_n$  and  $D_y f(x) = \lim_{n \rightarrow \infty} \nabla f(x_n) \cdot y$ . Thus, as  $\nabla f(x_n) = v_{x_n, x_0}$ ,

$$D_{-v_{x,x_0}} f(x) = - \lim_{n \rightarrow \infty} v_{x_n, x_0} \cdot v_{x,x_0}.$$

Then observe that

$$\begin{aligned} v_{x_n, x_0} \cdot v_{x, x_0} &= h_{x_n, x_0} \cdot h_{x, x_0} + (v_{x_n, x_0} - h_{x_n, x_0}) \cdot h_{x, x_0} + h_{x_n, x_0} \cdot (v_{x, x_0} - h_{x, x_0}) \\ &\quad + (v_{x_n, x_0} - h_{x_n, x_0}) \cdot (v_{x, x_0} - h_{x, x_0}) \\ &\geq h_{x_n, x_0} \cdot h_{x, x_0} - \|v_{x_n, x_0} - h_{x_n, x_0}\| \|h_{x, x_0}\| - \|h_{x_n, x_0}\| \|v_{x, x_0} - h_{x, x_0}\| \\ &\quad - \|v_{x_n, x_0} - h_{x_n, x_0}\| \|v_{x, x_0} - h_{x, x_0}\| \\ &\geq h_{x_n, x_0} \cdot h_{x, x_0} - \|h_{x, x_0}\| \sqrt{\epsilon} K \frac{d^3}{2^d} \max(\|x\|, \|x_0\|) \\ &\quad - \|h_{x_n, x_0}\| \sqrt{\epsilon} K \frac{d^3}{2^d} \max(\|x\|, \|x_0\|) - \epsilon \left[ K \frac{d^3}{2^d} \right]^2 \max(\|x_n\|, \|x_0\|) \max(\|x\|, \|x_0\|) \end{aligned}$$

where in the last inequality, we used (12). By the continuity of  $h_{x,x_0}$  for non-zero  $x \in \mathbb{R}^k$ , we have that for  $x \in S_{4\sqrt{\epsilon} K d^3, x_0}^c$ :

$$\begin{aligned} \lim_{n \rightarrow \infty} v_{x_n, x_0} \cdot v_{x, x_0} &\geq \|h_{x, x_0}\|^2 - 2\|h_{x, x_0}\| \sqrt{\epsilon} K \frac{d^3}{2^d} \max(\|x\|, \|x_0\|) - \epsilon \left[ K \frac{d^3}{2^d} \right]^2 \max(\|x\|, \|x_0\|)^2 \\ &= \frac{\|h_{x, x_0}\|}{2} \left( \|h_{x, x_0}\| - 4\sqrt{\epsilon} K \frac{d^3}{2^d} \max(\|x\|, \|x_0\|) \right) \\ &\quad + \frac{1}{2} \left( \|h_{x, x_0}\|^2 - 2\epsilon \left[ K \frac{d^3}{2^d} \right]^2 \max(\|x\|, \|x_0\|)^2 \right) \\ &> 0. \end{aligned}$$

Hence we conclude that for all  $x \in S_{4\sqrt{\epsilon}Kd^3, x_0}^c$ ,  $D_{-v_{x, x_0}} f(x) < 0$ .

We now show that  $D_x f(0) < 0$  for all  $x \neq 0$ . Observe that we can write the objective function as

$$f(x) = \frac{1}{2} \sum_{\ell=1}^m (|\langle a_\ell, (\Pi_{i=d}^1 W_{i,+} x) \rangle| - |\langle a_\ell, (\Pi_{i=d}^1 W_{i,+} x_0) \rangle|)^2$$

where  $a_\ell$  is a row of  $A$ . Then for any  $t > 0$ , we have that by the positive homogeneity of  $G$ ,

$$\begin{aligned} f(tx) &= \frac{1}{2} \sum_{\ell=1}^m (t^2 |\langle a_\ell, (\Pi_{i=d}^1 W_{i,+} x) \rangle|^2 + |\langle a_\ell, (\Pi_{i=d}^1 W_{i,+} x_0) \rangle|^2 \\ &\quad - 2t |\langle a_\ell, (\Pi_{i=d}^1 W_{i,+} x) \rangle \langle a_\ell, (\Pi_{i=d}^1 W_{i,+} x_0) \rangle|). \end{aligned}$$

Then since

$$f(0) = \frac{1}{2} \sum_{\ell=1}^m |\langle a_\ell, (\Pi_{i=d}^1 W_{i,+} x_0) \rangle|^2$$

we have that

$$\begin{aligned} D_x f(0) &= \lim_{t \rightarrow 0^+} \frac{f(tx) - f(0)}{t} \\ &= - \sum_{\ell=1}^m |\langle a_\ell, (\Pi_{i=d}^1 W_{i,+} x) \rangle \langle a_\ell, (\Pi_{i=d}^1 W_{i,+} x_0) \rangle| \\ &= - \langle (\Pi_{i=d}^1 W_{i,+} x), A_{G(x)}^\top A_{G(x_0)} (\Pi_{i=d}^1 W_{i,+} x_0) \rangle. \end{aligned}$$

We now focus on bounding this quantity from above by using the angle concentration property derived in Lemma 4. We use the shorthand notation  $\Lambda_x := \Pi_{i=d}^1 W_{i,+} x$  and  $\Lambda_{x_0} := \Pi_{i=d}^1 W_{i,+} x_0$ . Observe that we can write

$$\langle \Lambda_x x, A_{G(x)}^\top A_{G(x_0)} \Lambda_{x_0} x_0 \rangle = \cos(\angle(A_{G(x)} \Lambda_x x, A_{G(x_0)} \Lambda_{x_0} x_0)) \|A_{G(x_0)} \Lambda_{x_0} x_0\|. \quad (13)$$

However, by Lemma 4, we have that

$$\cos \varphi(\theta_d) - 4L\epsilon \leq \cos(\angle(A_{G(x)} \Lambda_x x, A_{G(x_0)} \Lambda_{x_0} x_0)) \leq \cos \varphi(\theta_d) + 4L\epsilon \quad (14)$$

where  $\varphi$  is defined in (24) and  $\theta_d := \angle(\Lambda_x x, \Lambda_{x_0} x_0)$ . Thus combining (14) and (13) gives

$$\langle \Lambda_x x, A_{G(x)}^\top A_{G(x_0)} \Lambda_{x_0} x_0 \rangle \geq (\cos \varphi(\theta_d) - 4L\epsilon) \|A_{G(x)} \Lambda_x x\| \|A_{G(x_0)} \Lambda_{x_0} x_0\|. \quad (15)$$

However, note that

$$\cos \varphi(\theta) = \frac{(\pi - 2\theta) \cos \theta + 2 \sin \theta}{\pi} \geq \frac{2}{\pi} \quad \forall \theta \in [0, \pi]. \quad (16)$$

Hence if  $\epsilon < 1/(4L\pi)$ , we have that by (15), (16), and (13), the following holds:

$$\langle \Lambda_x x, A_{G(x)}^\top A_{G(x_0)} \Lambda_{x_0} x_0 \rangle \geq \frac{1}{\pi} \|A_{G(x)} \Lambda_x x\| \|A_{G(x_0)} \Lambda_{x_0} x_0\|. \quad (17)$$

Finally, Lemma 4 establishes that for all non-zero  $x, x_0 \in \mathbb{R}^k$ ,

$$\|A_{G(x)} \Lambda_x x\|, \|A_{G(x_0)} \Lambda_{x_0} x_0\| \neq 0. \quad (18)$$

Hence we conclude that

$$\begin{aligned} D_x f(0) &= - \langle \Lambda_x x, A_{G(x)}^\top A_{G(x_0)} \Lambda_{x_0} x_0 \rangle \\ &\leq - \frac{1}{\pi} \|A_{G(x)} \Lambda_x x\| \|A_{G(x_0)} \Lambda_{x_0} x_0\| \\ &< 0 \end{aligned}$$

where we used (17) in the first inequality and (18) in the last inequality.

We conclude by applying Proposition 1 and  $24\pi d^6 \sqrt{4\sqrt{\epsilon}Kd^3} \leq 1$  to attain

$$S_{4\sqrt{\epsilon}Kd^3, x_0} \subset \mathcal{B}(x_0, 89d\sqrt{4\sqrt{\epsilon}Kd^3}\|x_0\|) \cup \mathcal{B}(\rho_d x_0, 77422\pi^2 d^{12} \sqrt{4\sqrt{\epsilon}Kd^3}\|x_0\|).$$

□

We record some results that were used in the above proof. In [20], it was shown that Gaussian  $W_i$  satisfies the WDC with high probability:

**Lemma 1** (Lemma 9 in [20]). *Fix  $0 < \epsilon < 1$ . Let  $W \in \mathbb{R}^{n \times k}$  have i.i.d.  $\mathcal{N}(0, 1/n)$  entries. If  $n \geq ck \log k$  then with probability at least  $1 - 8n \exp(-\gamma k)$ ,  $W$  satisfies the WDC with constant  $\epsilon$ . Here  $c, \gamma^{-1}$  are constants that depend only polynomially on  $\epsilon^{-1}$ .*

The following is a technical result showing concentration of  $\bar{v}_{x,x_0}$  around  $h_{x,x_0}$ :

**Lemma 2.** *Fix  $0 < \epsilon < d^{-4}(1/16\pi)^2$  and let  $d \geq 2$ . Let  $W_i$  satisfy the WDC with constant  $\epsilon$  for  $i = 1, \dots, d$ . For any non-zero  $x, y \in \mathbb{R}^k$ , we have*

$$\|\bar{v}_{x,y} - h_{x,y}\| \leq \frac{78d^3}{2^d} \sqrt{\epsilon} \max(\|x\|, \|y\|).$$

*Proof.* Observe that

$$\begin{aligned} \|\bar{v}_{x,y} - h_{x,y}\| &\leq \underbrace{\left\| (\Pi_{i=d}^1 W_{i,+,x})^\top (\Pi_{i=d}^1 W_{i,+,x}) x - \frac{1}{2^d} x \right\|}_{=Q_1} \\ &\quad + \underbrace{\left\| \frac{\pi - 2\theta_d}{\pi} (\Pi_{i=d}^1 W_{i,+,x})^\top (\Pi_{i=d}^1 W_{i,+,y}) y - \frac{\pi - 2\bar{\theta}_d}{\pi} \tilde{h}_{x,y} \right\|}_{=Q_2} \\ &\quad + \underbrace{\left\| \frac{2 \sin \theta_d}{\pi} \frac{\|(\Pi_{i=d}^1 W_{i,+,y}) y\|}{\|(\Pi_{i=d}^1 W_{i,+,x}) x\|} (\Pi_{i=d}^1 W_{i,+,x})^\top (\Pi_{i=d}^1 W_{i,+,x}) x - \frac{2 \sin \bar{\theta}_d}{\pi} \frac{\|y\|}{\|x\|} \frac{1}{2^d} x \right\|}_{=Q_3}. \end{aligned}$$

We focus on bounding each individual quantity  $Q_i$  for  $i = 1, 2, 3$ . For  $Q_1$ , we have that by (20) in Lemma 3,

$$Q_1 = \left\| (\Pi_{i=d}^1 W_{i,+,x})^\top (\Pi_{i=d}^1 W_{i,+,x}) x - \frac{1}{2^d} x \right\| \leq 24 \frac{d^3 \sqrt{\epsilon}}{2^d} \|x\|. \quad (19)$$

Then for  $Q_2$ , observe that by the triangle inequality, we have

$$\begin{aligned} Q_2 &\leq \left\| \frac{\pi - 2\theta_d}{\pi} (\Pi_{i=d}^1 W_{i,+,x})^\top (\Pi_{i=d}^1 W_{i,+,y}) y - \frac{\pi - 2\theta_d}{\pi} \tilde{h}_{x,y} \right\| \\ &\quad + \left\| \frac{\pi - 2\theta_d}{\pi} \tilde{h}_{x,y} - \frac{\pi - 2\bar{\theta}_d}{\pi} \tilde{h}_{x,y} \right\| \\ &\stackrel{(*)}{\leq} \left| \frac{\pi - 2\theta_d}{\pi} \right| 24 \frac{d^3 \sqrt{\epsilon}}{2^d} \|y\| + \left| \frac{2}{\pi} (\theta_d - \bar{\theta}_d) \right| \|\tilde{h}_{x,y}\| \\ &\stackrel{(**)}{\leq} 24 \frac{d^3 \sqrt{\epsilon}}{2^d} \|y\| + \frac{8d \sqrt{\epsilon}}{\pi} \left(1 + \frac{d}{\pi}\right) \|y\| \end{aligned}$$

where in  $(*)$  we used (20) and  $(**)$  used (23) and the fact that  $\|\tilde{h}_{x,y}\| \leq 2^{-d}(1 + \frac{d}{\pi})\|y\|$ . Hence

$$Q_2 \leq \frac{1}{2^d} \left( 24d^3 + \frac{8d}{\pi} \left(1 + \frac{d}{\pi}\right) \right) \sqrt{\epsilon} \|y\|.$$

To bound  $Q_3$ , let  $y_d := (\Pi_{i=d}^1 W_{i,+,y})y$  and  $x_d := (\Pi_{i=d}^1 W_{i,+,x})x$ . We use the triangle inequality to gather the following three quantities to bound:

$$\begin{aligned}
Q_3 &\leq \underbrace{\left\| \frac{2 \sin \theta_d}{\pi} - \frac{2 \sin \bar{\theta}_d}{\pi} \right\| \frac{\|y_d\|}{\|x_d\|} \left\| (\Pi_{i=d}^1 W_{i,+,x})^\top x_d \right\|}_{=Q_{3,1}} \\
&+ \underbrace{\left\| \frac{2 \sin \bar{\theta}_d}{\pi} \frac{\|y_d\|}{\|x_d\|} (\Pi_{i=d}^1 W_{i,+,x})^\top (\Pi_{i=d}^1 W_{i,+,x})x - \frac{2 \sin \bar{\theta}_d}{\pi} \frac{\|y\|}{\|x\|} (\Pi_{i=d}^1 W_{i,+,x})^\top (\Pi_{i=d}^1 W_{i,+,x})x \right\|}_{=Q_{3,2}} \\
&+ \underbrace{\left\| \frac{2 \sin \bar{\theta}_d}{\pi} \frac{\|y\|}{\|x\|} (\Pi_{i=d}^1 W_{i,+,x})^\top (\Pi_{i=d}^1 W_{i,+,x})x - \frac{2 \sin \bar{\theta}_d}{\pi} \frac{\|y\|}{\|x\|} \frac{1}{2^d} x \right\|}_{=Q_{3,3}}.
\end{aligned}$$

Using (8) and (23) gives

$$\begin{aligned}
Q_{3,1} &\leq \frac{2}{\pi} |\theta_d - \bar{\theta}_d| \left( \frac{1}{2} + \epsilon \right)^d \frac{\|y\|}{\|x\|} \|x\| \\
&\leq \frac{8d}{\pi} \left( \frac{1}{2} + \epsilon \right)^d \sqrt{\epsilon} \|y\| \\
&= \frac{8d(1+2\epsilon)^d}{\pi 2^d} \sqrt{\epsilon} \|y\|.
\end{aligned}$$

Likewise, equations (8) and (22) gives

$$\begin{aligned}
Q_{3,2} &\leq \left\| \frac{\|y_d\|}{\|x_d\|} - \frac{\|y\|}{\|x\|} \right\| \left\| \frac{2 \sin \bar{\theta}_d}{\pi} \right\| \left( \frac{1}{2} + \epsilon \right)^d \|x\| \\
&\leq 8d\epsilon \frac{\|y\|}{\|x\|} \frac{2}{\pi} \left( \frac{1}{2} + \epsilon \right)^d \|x\| \\
&\leq \frac{16d\sqrt{\epsilon}}{\pi} \left( \frac{1}{2} + \epsilon \right)^d \|y\| \\
&= \frac{16d(1+2\epsilon)^d}{\pi 2^d} \sqrt{\epsilon} \|y\|
\end{aligned}$$

Lastly, we use (20) to attain

$$\begin{aligned}
Q_{3,3} &\leq \left\| \frac{2 \sin \bar{\theta}_d}{\pi} \right\| \frac{\|y\|}{\|x\|} \left\| (\Pi_{i=d}^1 W_{i,+,x})^\top (\Pi_{i=d}^1 W_{i,+,x})x - \frac{1}{2^d} x \right\| \\
&\leq \frac{2}{\pi} \frac{\|y\|}{\|x\|} 24 \frac{d^3 \sqrt{\epsilon}}{2^d} \|x\| \\
&\leq \frac{48d^3 \sqrt{\epsilon}}{\pi 2^d} \|y\|.
\end{aligned}$$

Combining the bounds for  $Q_{3,i}$  for  $i = 1, 2, 3$  gives

$$\begin{aligned}
Q_3 &\leq Q_{3,1} + Q_{3,2} + Q_{3,3} \\
&\leq \frac{8d(1+2\epsilon)^d}{\pi 2^d} \sqrt{\epsilon} \|y\| + \frac{16d(1+2\epsilon)^d}{\pi 2^d} \sqrt{\epsilon} \|y\| + \frac{48d^3 \sqrt{\epsilon}}{\pi 2^d} \|y\| \\
&= \frac{1}{2^d} \left( \frac{24d(1+2\epsilon)^d + 48d^3}{\pi} \right) \sqrt{\epsilon} \|y\|.
\end{aligned}$$

Thus we attain

$$Q_1 + Q_2 + Q_3 \leq \frac{K_d}{2^d} \sqrt{\epsilon} \max(\|x\|, \|y\|)$$

where

$$K_d = 24d^3 + 24d^3 + \frac{8d(1+d/\pi)}{\pi} + \frac{24(1+2\epsilon)^d}{\pi} + \frac{48d^3}{\pi} \leq 78d^3$$

as long as  $\epsilon \leq \min(1/2d, 1/96)$ .  $\square$

The following result summarizes some useful bounds from [20]:

**Lemma 3** (Results from Lemma 5 in [20]). *Fix  $0 < \epsilon < d^{-4}(1/16\pi)^2$  and let  $d \geq 2$ . Let  $W_i$  satisfy the WDC with constant  $\epsilon$  for  $i = 1, \dots, d$ . Then for any non-zero  $x, y \in \mathbb{R}^k$ , the following hold:*

$$\left\| (\Pi_{i=d}^1 W_{i,+x})^\top (\Pi_{i=d}^1 W_{i,+,y}) y - \tilde{h}_{x,y} \right\| \leq 24 \frac{d^3 \sqrt{\epsilon}}{2^d} \|y\|, \quad (20)$$

$$\langle (\Pi_{i=d}^1 W_{i,+,x}) x, (\Pi_{i=d}^1 W_{i,+,y}) y \rangle \geq \frac{1}{4\pi} \frac{1}{2^d} \|x\| \|y\|, \quad (21)$$

$$\left| \frac{\|y_d\|}{\|x_d\|} - \frac{\|y\|}{\|x\|} \right| \leq 8d\epsilon \frac{\|y\|}{\|x\|}, \quad (22)$$

$$|\theta_d - \bar{\theta}_d| \leq 4d\sqrt{\epsilon} \quad (23)$$

where  $x_d := (\Pi_{i=d}^1 W_{i,+,x}) x$ ,  $y_d := (\Pi_{i=d}^1 W_{i,+,y}) y$ ,  $\theta_d := \angle(x_d, y_d)$ ,  $\bar{\theta}_d := g^{\odot d}(\angle(x, y))$ , and the vector  $\tilde{h}_{x,y}$  is defined as

$$\tilde{h}_{x,y} := \frac{1}{2^d} \left[ \left( \prod_{i=0}^{d-1} \frac{\pi - \bar{\theta}_i}{\pi} \right) y + \sum_{i=0}^{d-1} \frac{\sin \bar{\theta}_i}{\pi} \left( \prod_{j=i+1}^{d-1} \frac{\pi - \bar{\theta}_j}{\pi} \right) \frac{\|y\|}{\|x\|} x \right].$$

## 5.2 Angle Concentration Property of $A_{G(x)}$

We need to understand how the operator  $z \mapsto A_z z$  distorts angles. Observe that for  $z, w \in \mathcal{S}^{n-1}$  for which the RRCP holds, we have that

$$\begin{aligned} \langle z, A_z^\top A_w w \rangle &\approx \langle z, \Phi_{z,w} w \rangle = \left\langle z, \left( \frac{\pi - 2\theta_{z,w}}{\pi} I + \frac{2 \sin \theta_{z,w}}{\pi} M_{z \leftrightarrow w} \right) w \right\rangle \\ &= \frac{\pi - 2\theta_{z,w}}{\pi} \langle z, w \rangle + \frac{2 \sin \theta_{z,w}}{\pi} \|z\|^2 \\ &= \frac{(\pi - 2\theta_{z,w}) \cos \theta_{z,w} + 2 \sin \theta_{z,w}}{\pi} \\ &:= \cos \varphi(\theta_{z,w}) \end{aligned}$$

where  $\varphi : \mathbb{R} \rightarrow \mathbb{R}$  is defined by

$$\varphi(\theta) := \cos^{-1} \left( \frac{(\pi - 2\theta) \cos \theta + 2 \sin \theta}{\pi} \right). \quad (24)$$

The following lemma establishes that the angle  $\angle(A_{G(x)} G(x), A_{G(y)} G(y))$  concentrates around  $\varphi(\angle(G(x), G(y)))$ .

**Lemma 4.** *Fix  $0 < \epsilon < 1/4L$ . Suppose  $A \in \mathbb{R}^{m \times n_d}$  satisfies the RRCP with constant  $\epsilon$ . Suppose  $G$  is such that each  $W_i \in \mathbb{R}^{n_i \times n_{i-1}}$  satisfy the WDC with constant  $\epsilon$  for all  $i \in [d]$ . Then for all  $x, y \in \mathbb{R}^k \setminus \{0\}$ , the angle  $\theta_1 := \angle(A_{G(x)} G(x), A_{G(y)} G(y))$  is well-defined and*

$$|\cos \theta_1 - \cos \varphi(\theta_0)| \leq 4L\epsilon$$

where  $\theta_0 = \angle(G(x), G(y))$ ,  $\varphi$  is defined in (24), and  $L$  is a positive universal constant.

*Proof.* Fix  $x, y \in \mathbb{R}^k \setminus \{0\}$ . We use the shorthand notation  $\Lambda_x := \Pi_{i=d}^1 W_{i,+,x}$  and  $\Lambda_y := \Pi_{i=d}^1 W_{i,+,y}$ . Note that the WDC implies that for sufficiently small  $\epsilon$ , we have that  $\Lambda_x x, \Lambda_y y \neq 0$ .

Hence we may assume, without loss of generality, that  $\|\Lambda_x x\| = \|\Lambda_y y\| = 1$ . Now define the following quantities:

$$\begin{aligned}\delta_1 &:= \langle \Lambda_x x, (A_{G(x)}^\top A_{G(y)} - \Phi_{G(x), G(y)}) \Lambda_y y \rangle, \\ \delta_2 &:= \langle \Lambda_x x, (A_{G(x)}^\top A_{G(x)} - I) \Lambda_x x \rangle \\ \delta_3 &:= \langle \Lambda_y y, (A_{G(y)}^\top A_{G(y)} - I) \Lambda_y y \rangle.\end{aligned}$$

Observe that by the RRCP, we have that  $\max_{i=1,2,3} |\delta_i| \leq L\epsilon$ . Hence if  $0 < \epsilon < 1/L$ ,

$$0 < 1 - L\epsilon \leq \|A_{G(x)} \Lambda_x x\|^2$$

so  $\|A_{G(x)} \Lambda_x x\|, \|A_{G(y)} \Lambda_y y\| \neq 0$ . Furthermore, note that

$$\begin{aligned}\cos \theta_1 &= \frac{\langle \Lambda_x x, A_{G(x)}^\top A_{G(y)} \Lambda_y y \rangle}{\|A_{G(x)} \Lambda_x x\| \|A_{G(y)} \Lambda_y y\|} \\ &= \frac{\langle \Lambda_x x, A_{G(x)}^\top A_{G(y)} \Lambda_y y \rangle}{\sqrt{\langle A_{G(x)} \Lambda_x x, A_{G(x)} \Lambda_x x \rangle \langle A_{G(y)} \Lambda_y y, A_{G(y)} \Lambda_y y \rangle}} \\ &= \frac{\langle \Lambda_x x, \Phi_{G(x), G(y)} \Lambda_y y \rangle + \delta_1}{\sqrt{(\langle \Lambda_x x, \Lambda_x x \rangle + \delta_2) (\langle \Lambda_y y, \Lambda_y y \rangle + \delta_3)}} \\ &= \frac{\langle \Lambda_x x, \Phi_{G(x), G(y)} \Lambda_y y \rangle + \delta_1}{\sqrt{(1 + \delta_2) (1 + \delta_3)}}.\end{aligned}$$

Thus if  $\epsilon < 1/4L$ , we attain

$$\begin{aligned}|\cos \theta_1 - \langle \Lambda_x x, \Phi_{G(x), G(y)} \Lambda_y y \rangle| &\leq \left| \frac{\langle \Lambda_x x, \Phi_{G(x), G(y)} \Lambda_y y \rangle + \delta_1}{\sqrt{(1 + \delta_2) (1 + \delta_3)}} - \langle \Lambda_x x, \Phi_{G(x), G(y)} \Lambda_y y \rangle \right| \\ &\leq \left| \langle \Lambda_x x, \Phi_{G(x), G(y)} \Lambda_y y \rangle \right| \left| 1 - \frac{1}{\sqrt{(1 + \delta_2) (1 + \delta_3)}} \right| \\ &\quad + \frac{|\delta_1|}{\sqrt{(1 + \delta_2) (1 + \delta_3)}} \\ &\leq 2 \left| 1 - \frac{1}{1 - L\epsilon} \right| + \frac{L\epsilon}{1 - L\epsilon} \\ &\leq \frac{3L\epsilon}{1 - L\epsilon} \leq 4L\epsilon\end{aligned}$$

where we used  $\|\Phi_{G(x), G(y)}\| \leq 2$  in the third inequality.  $\square$

### 5.3 Determining where $h_{x, x_0}$ vanishes

Before proving Proposition 1, we outline how the concentrated gradient  $h_{x, x_0}$  was derived. Recall that at points of differentiability, our descent direction is of the following form:

$$v_{x, x_0} = (\Pi_{i=d}^1 W_{i,+,x})^\top A_{G(x)}^\top A_{G(x)} (\Pi_{i=d}^1 W_{i,+,x}) x - (\Pi_{i=d}^1 W_{i,+,x})^\top A_{G(x)}^\top A_{G(x_0)} (\Pi_{i=d}^1 W_{i,+,x_0}) x_0.$$

The concentration of the first term follows by the RRCP and Lemma 3:

$$(\Pi_{i=d}^1 W_{i,+,x})^\top A_{G(x)}^\top A_{G(x)} (\Pi_{i=d}^1 W_{i,+,x}) x \approx (\Pi_{i=d}^1 W_{i,+,x})^\top (\Pi_{i=d}^1 W_{i,+,x}) x \approx \frac{1}{2d} x.$$

For the second term, note that the RRCP gives

$$(\Pi_{i=d}^1 W_{i,+,x})^\top A_{G(x)}^\top A_{G(x_0)} (\Pi_{i=d}^1 W_{i,+,x_0}) x_0 \approx (\Pi_{i=d}^1 W_{i,+,x})^\top \Phi_{G(x), G(x_0)} (\Pi_{i=d}^1 W_{i,+,x_0}) x_0.$$

Letting  $x_d = (\Pi_{i=d}^1 W_{i,+,x}) x$  and  $x_{0,d} = (\Pi_{i=d}^1 W_{i,+,x_0}) x_0$ , note that

$$\Phi_{x_d, x_{0,d}} = \frac{\pi - 2\theta_d}{\pi} I_{n_d} + \frac{2 \sin \theta_d}{\pi} M_{\hat{x}_d \leftrightarrow \hat{x}_{0,d}}$$

where  $\theta_d = \angle(x_d, x_{0,d})$ . By Lemma 5 in [20], this angle is well-defined and  $\|x_d\|, \|x_{0,d}\| \neq 0$  as long as each  $W_i$  satisfies the WDC. Finally, note that the definition of  $M_{\hat{x} \leftrightarrow \hat{y}}$  gives

$$M_{\hat{x}_d \leftrightarrow \hat{x}_{0,d}} x_{0,d} = \|x_{0,d}\| M_{\hat{x}_d \leftrightarrow \hat{x}_{0,d}} \hat{x}_{0,d} = \|x_{0,d}\| \hat{x}_d = \frac{\|x_{0,d}\|}{\|x_d\|} x_d.$$

Thus we see that

$$\begin{aligned} & (\Pi_{i=d}^1 W_{i,+x})^\top \Phi_{x_d, x_{0,d}} (\Pi_{i=d}^1 W_{i,+x_0}) x_0 \\ &= \frac{\pi - 2\theta_d}{\pi} (\Pi_{i=d}^1 W_{i,+x})^\top (\Pi_{i=d}^1 W_{i,+x_0}) x_0 + \frac{2 \sin \theta_d}{\pi} \frac{\|x_{0,d}\|}{\|x_d\|} (\Pi_{i=d}^1 W_{i,+x})^\top (\Pi_{i=d}^1 W_{i,+x}) x \\ &\approx \frac{\pi - 2\bar{\theta}_d}{\pi} \tilde{h}_{x,x_0} + \frac{2 \sin \bar{\theta}_d}{\pi} \frac{\|x_0\|}{\|x\|} \frac{1}{2^d} x \end{aligned}$$

where  $\bar{\theta}_d = g^{\circ d}(\angle(x, x_0))$  and the definition of  $\tilde{h}_{x,x_0}$  is given in Lemma 3. We recall its definition here for convenience:

$$\tilde{h}_{x,x_0} := \frac{1}{2^d} \left[ \left( \prod_{i=0}^{d-1} \frac{\pi - \bar{\theta}_i}{\pi} \right) x_0 + \sum_{i=0}^{d-1} \frac{\sin \bar{\theta}_i}{\pi} \left( \prod_{j=i+1}^{d-1} \frac{\pi - \bar{\theta}_j}{\pi} \right) \frac{\|x_0\|}{\|x\|} x \right].$$

The concentration of the angle  $\theta_d$  and norm  $\|x_{0,d}\|/\|x_d\|$  are given in Lemma 3. Thus, combining the concentrations of the two terms in  $v_{x,x_0}$  gives

$$\begin{aligned} h_{x,x_0} &= \frac{1}{2^d} x - \frac{\pi - 2\bar{\theta}_d}{\pi} \tilde{h}_{x,x_0} - \frac{2 \sin \bar{\theta}_d}{\pi} \frac{\|x_0\|}{\|x\|} \frac{1}{2^d} x \\ &= \frac{1}{2^d} \|x\| \hat{x} - \frac{\|x_0\|}{2^d} \frac{2 \sin \bar{\theta}_d}{\pi} \hat{x} \\ &\quad - \frac{1}{2^d} \left( \frac{\pi - 2\bar{\theta}_d}{\pi} \right) \left[ \left( \prod_{i=0}^{d-1} \frac{\pi - \bar{\theta}_i}{\pi} \right) \|x_0\| \hat{x}_0 + \sum_{i=0}^{d-1} \frac{\sin \bar{\theta}_i}{\pi} \left( \prod_{j=i+1}^{d-1} \frac{\pi - \bar{\theta}_j}{\pi} \right) \|x_0\| \hat{x} \right] \\ &= -\frac{\|x_0\|}{2^d} \left( \frac{\pi - 2\bar{\theta}_d}{\pi} \right) \left( \prod_{i=0}^{d-1} \frac{\pi - \bar{\theta}_i}{\pi} \right) \hat{x}_0 \\ &\quad + \frac{1}{2^d} \left[ \|x\| - \|x_0\| \left( \frac{2 \sin \bar{\theta}_d}{\pi} + \left( \frac{\pi - 2\bar{\theta}_d}{\pi} \right) \sum_{i=0}^{d-1} \frac{\sin \bar{\theta}_i}{\pi} \left( \prod_{j=i+1}^{d-1} \frac{\pi - \bar{\theta}_j}{\pi} \right) \right) \right] \hat{x} \end{aligned}$$

Now, we establish that the set of all  $x$  such that  $\|h_{x,x_0}\| \approx 0$ , denoted by  $S_{\epsilon, x_0}$ , is contained in two neighborhoods centered at  $x_0$  and a negative multiple  $-\rho_d x_0$ .

**Proposition 1.** Suppose  $24\pi d^6 \sqrt{\epsilon} \leq 1$ . Let

$$S_{\epsilon, x_0} = \left\{ x \in \mathbb{R}^k \setminus \{0\} : \|h_{x,x_0}\| \leq \frac{1}{2^d} \epsilon \max(\|x\|, \|x_0\|) \right\}$$

where  $d \geq 2$  and let

$$\begin{aligned} h_{x,x_0} &= -\frac{\|x_0\|}{2^d} \left( \frac{\pi - 2\bar{\theta}_d}{\pi} \right) \left( \prod_{i=0}^{d-1} \frac{\pi - \bar{\theta}_i}{\pi} \right) \hat{x}_0 \\ &\quad + \frac{1}{2^d} \left[ \|x\| - \|x_0\| \left( \frac{2 \sin \bar{\theta}_d}{\pi} + \left( \frac{\pi - 2\bar{\theta}_d}{\pi} \right) \sum_{i=0}^{d-1} \frac{\sin \bar{\theta}_i}{\pi} \left( \prod_{j=i+1}^{d-1} \frac{\pi - \bar{\theta}_j}{\pi} \right) \right) \right] \hat{x}. \end{aligned}$$

where  $\bar{\theta}_0 = \angle(x, x_0)$  and  $\bar{\theta}_i = g(\bar{\theta}_{i-1})$ . Define

$$\rho_d := \frac{2 \sin \bar{\theta}_d}{\pi} + \left( \frac{\pi - 2\bar{\theta}_d}{\pi} \right) \sum_{i=0}^{d-1} \frac{\sin \bar{\theta}_i}{\pi} \left( \prod_{j=i+1}^{d-1} \frac{\pi - \bar{\theta}_j}{\pi} \right)$$



where  $\check{\theta}_0 = \pi$  and  $\check{\theta}_i = g(\check{\theta}_{i-1})$ . If  $x \in S_{\epsilon, x_0}$ , then either

$$|\bar{\theta}_0| \leq 2\sqrt{\epsilon} \text{ and } ||x| - \|x_0|| \leq 29d\sqrt{\epsilon}\|x_0\|$$

or

$$|\bar{\theta}_0 - \pi| \leq 24\pi^2 d^4 \sqrt{\epsilon} \text{ and } ||x| - \rho_d \|x_0|| \leq 3517d^8 \sqrt{\epsilon}\|x_0\|.$$

In particular, we have

$$S_{\epsilon, x_0} \subset \mathcal{B}(x_0, 89d\sqrt{\epsilon}\|x_0\|) \cup \mathcal{B}(-\rho_d x_0, 77422\pi^2 d^{12} \sqrt{\epsilon}\|x_0\|).$$

Additionally,  $\rho_d \rightarrow 1$  as  $d \rightarrow \infty$ .

*Proof.* Without loss of generality, let  $x_0 = e_1$  and  $\|x_0\| = 1$  where  $e_1$  is the first standard basis vector in  $\mathbb{R}^k$ . We also set  $x = \|x\| (\cos \bar{\theta}_0 e_1 + \sin \bar{\theta}_0 e_2)$  where  $\bar{\theta}_0 = \angle(x, x_0)$ . Then

$$\begin{aligned} h_{x, x_0} &= -\frac{1}{2^d} \left( \frac{\pi - 2\bar{\theta}_d}{\pi} \right) \left( \prod_{i=0}^{d-1} \frac{\pi - \bar{\theta}_i}{\pi} \right) \hat{x}_0 \\ &\quad + \frac{1}{2^d} \left[ \|x\| - \left( \frac{2 \sin \bar{\theta}_d}{\pi} + \left( \frac{\pi - 2\bar{\theta}_d}{\pi} \right) \sum_{i=0}^{d-1} \frac{\sin \bar{\theta}_i}{\pi} \left( \prod_{j=i+1}^{d-1} \frac{\pi - \bar{\theta}_j}{\pi} \right) \right) \right] \hat{x}. \end{aligned}$$

Set

$$\beta = \left( \frac{\pi - 2\bar{\theta}_d}{\pi} \right) \left( \prod_{i=0}^{d-1} \frac{\pi - \bar{\theta}_i}{\pi} \right) \text{ and } \alpha = \frac{2 \sin \bar{\theta}_d}{\pi} + \left( \frac{\pi - 2\bar{\theta}_d}{\pi} \right) \sum_{i=0}^{d-1} \frac{\sin \bar{\theta}_i}{\pi} \left( \prod_{j=i+1}^{d-1} \frac{\pi - \bar{\theta}_j}{\pi} \right)$$

with  $r = \|x\|$  and  $M = \max(r, 1)$ . Note that we can write

$$h_{x, x_0} = \frac{1}{2^d} (-\beta \hat{x}_0 + (r - \alpha) \hat{x})$$

Then if  $x \in S_{\epsilon, x_0}$ , we have that

$$|-\beta + \cos \bar{\theta}_0 (r - \alpha)| \leq \epsilon M \tag{25}$$

$$|\sin \bar{\theta}_0 (r - \alpha)| \leq \epsilon M. \tag{26}$$

We now tabulate some useful bounds from Lemma 8 in [20]:

$$\bar{\theta}_i \in [0, \pi/2] \text{ for } i \geq 1 \tag{27}$$

$$\bar{\theta}_i \leq \bar{\theta}_{i-1} \text{ for } i \geq 1 \tag{28}$$

$$\left| \prod_{i=0}^{d-1} \frac{\pi - \bar{\theta}_i}{\pi} \right| \leq 1 \tag{29}$$

$$\prod_{i=0}^{d-1} \frac{\pi - \bar{\theta}_i}{\pi} \geq \frac{\pi - \bar{\theta}_0}{\pi d^3} \tag{30}$$

$$\left| \sum_{i=0}^{d-1} \frac{\sin \bar{\theta}_i}{\pi} \left( \prod_{j=i+1}^{d-1} \frac{\pi - \bar{\theta}_j}{\pi} \right) \right| \leq \frac{d}{\pi} \sin \bar{\theta}_0 \tag{31}$$

$$\bar{\theta}_0 = \pi + O_1(\delta) \implies \bar{\theta}_i = \check{\theta}_i + O_1(i\delta) \tag{32}$$

$$\bar{\theta}_0 = \pi + O_1(\delta) \implies \left| \prod_{i=0}^{d-1} \frac{\pi - \bar{\theta}_i}{\pi} \right| \leq \frac{\delta}{\pi} \tag{33}$$

$$\left| \frac{\pi - 2\bar{\theta}_i}{\pi} \right| \leq 1 \quad \forall i \geq 1 \tag{34}$$

$$\bar{\theta}_d \leq \cos^{-1} \left( \frac{1}{\pi} \right) \quad \forall d \geq 2 \tag{35}$$

$$\check{\theta}_i \leq \frac{3\pi}{i+3} \quad \forall i \geq 0. \tag{36}$$

To prove the Proposition, we first show that it is sufficient to only consider the small and large angle case. Then, we show that in the small and large angle case,  $x \approx x_0$  and  $x \approx -\rho_d x_0$ , respectively. We begin by proving that  $\max(\|x\|, \|x_0\|) \leq 6d$  for any  $x \in S_{\epsilon, x_0}$ .

**Bound on maximal norm in  $S_{\epsilon, x_0}$ :** It suffices to show that  $r \leq 6d$ . Suppose  $r > 1$  since if  $r \leq 1$ , the result is immediate. Then either  $|\sin \bar{\theta}_0| \geq 1/\sqrt{2}$  or  $|\cos \bar{\theta}_0| \geq 1/\sqrt{2}$ . If  $|\sin \bar{\theta}_0| \geq 1/\sqrt{2}$  then (26) gives

$$|r - \alpha| \leq \sqrt{2}\epsilon r \implies (1 - \sqrt{2}\epsilon)r \leq |\alpha|.$$

But

$$\begin{aligned} |\alpha| &\leq \frac{2}{\pi} |\sin \bar{\theta}_d| + \left| \left( \frac{\pi - 2\bar{\theta}_d}{\pi} \right) \sum_{i=0}^{d-1} \frac{\sin \bar{\theta}_i}{\pi} \left( \prod_{j=i+1}^{d-1} \frac{\pi - \bar{\theta}_j}{\pi} \right) \right| \\ &\leq 1 + \frac{d}{\pi} \end{aligned}$$

where the second inequality used equations (31) and (34). Thus

$$r \leq \frac{1 + \frac{d}{\pi}}{1 - \sqrt{2}\epsilon} \leq 2 \left( 1 + \frac{d}{\pi} \right) \leq 2 + d \leq 2d$$

provided  $\epsilon < 1/4$  and  $d \geq 2$ . If  $|\cos \bar{\theta}_0| \geq 1/\sqrt{2}$ , then (25) gives

$$|r - \alpha| \leq \sqrt{2}(\epsilon r + |\beta|) \implies (1 - \sqrt{2}\epsilon)r \leq \sqrt{2}|\beta| + \alpha.$$

But by (29),

$$|\beta| = \left| \left( \frac{\pi - 2\bar{\theta}_d}{\pi} \right) \left( \prod_{i=0}^{d-1} \frac{\pi - \bar{\theta}_i}{\pi} \right) \right| \leq 1 \text{ since } \bar{\theta}_i \in [0, \pi/2] \forall i \geq 1.$$

Hence if  $\epsilon < 1/4$ ,

$$r \leq \frac{\sqrt{2} + 2d}{1 - \sqrt{2}\epsilon} \leq 2\sqrt{2} + 4d \leq \sqrt{2}d + 4d \leq 6d.$$

Thus in any case,  $r \leq 6d \implies M \leq 6d$ .

We now show that it is sufficient to only consider the small angle case  $\bar{\theta}_0 \approx 0$  and the large angle case  $\bar{\theta}_0 \approx \pi$ .

**Sufficiency:** We have two possible situations:

- $|r - \alpha| \geq \sqrt{\epsilon}M$ : Then (26) implies  
 $|\sin \bar{\theta}_0| \leq \sqrt{\epsilon} \implies \bar{\theta}_0 = O_1(2\sqrt{\epsilon}) \text{ or } \pi + O_1(2\sqrt{\epsilon}).$
- $|r - \alpha| \leq \sqrt{\epsilon}M$ : Then (25) implies  
 $|\beta| \leq 2\sqrt{\epsilon}M.$

But note that by (30),

$$\beta = \left( \frac{\pi - 2\bar{\theta}_d}{\pi} \right) \left( \prod_{i=0}^{d-1} \frac{\pi - \bar{\theta}_i}{\pi} \right) \geq \frac{(\pi - 2\bar{\theta}_d)(\pi - \bar{\theta}_0)}{d^3\pi^2}.$$

In addition, (35) implies

$$|\pi - 2\bar{\theta}_d| \geq \left| \pi - 2\cos^{-1}\left(\frac{1}{\pi}\right) \right| \geq \frac{1}{2}.$$

Thus

$$|\beta| \geq \frac{|(\pi - 2\bar{\theta}_d)(\pi - \bar{\theta}_0)|}{d^3\pi^2} \geq \frac{|\pi - \bar{\theta}_0|}{2d^3\pi^2}$$

which implies

$$|\pi - \bar{\theta}_0| \leq 4d^3\pi^2\sqrt{\epsilon}M \leq 24d^4\pi^2\sqrt{\epsilon}.$$

Thus  $\bar{\theta}_0 = \pi + O_1(24d^4\pi^2\sqrt{\epsilon})$ .

Lastly, we show that in the small angle case,  $x \approx x_0$ , while in the large angle case,  $x \approx -\rho_d x_0$ .

**Small Angle Case:** Assume  $\bar{\theta}_0 = O_1(2\sqrt{\epsilon})$ . Note that since  $\bar{\theta}_i \leq \bar{\theta}_0 \leq 2\sqrt{\epsilon}$  for each  $i$ , we have that

$$\prod_{i=0}^{d-1} \frac{\pi - \bar{\theta}_i}{\pi} \geq \left(1 - \frac{2\sqrt{\epsilon}}{\pi}\right)^d = 1 + O_1\left(\frac{4d\sqrt{\epsilon}}{\pi}\right)$$

provided  $2d\sqrt{\epsilon} \leq 1/2$ . Hence

$$\begin{aligned} \beta &= \left(\frac{\pi - 2\bar{\theta}_d}{\pi}\right) \left(\prod_{i=0}^{d-1} \frac{\pi - \bar{\theta}_i}{\pi}\right) \\ &\geq \left(1 + O_1\left(\frac{4\sqrt{\epsilon}}{\pi}\right)\right) \left(1 + O_1\left(\frac{4d\sqrt{\epsilon}}{\pi}\right)\right) \end{aligned}$$

where we used (32) in the second inequality. In addition,  $|\sin \bar{\theta}_d| \leq |\bar{\theta}_d| \leq 2\sqrt{\epsilon}$  and (31) imply that

$$\left| \sum_{i=0}^{d-1} \frac{\sin \bar{\theta}_i}{\pi} \left( \prod_{j=i+1}^{d-1} \frac{\pi - \bar{\theta}_j}{\pi} \right) \right| \leq \frac{d}{\pi} |\sin \bar{\theta}_d| \leq d\sqrt{\epsilon}.$$

Hence

$$\begin{aligned} \alpha &= \frac{2 \sin \bar{\theta}_d}{\pi} + \left(\frac{\pi - 2\bar{\theta}_d}{\pi}\right) \sum_{i=0}^{d-1} \frac{\sin \bar{\theta}_i}{\pi} \left( \prod_{j=i+1}^{d-1} \frac{\pi - \bar{\theta}_j}{\pi} \right) \\ &= O_1\left(\frac{4\sqrt{\epsilon}}{3\pi}\right) + \left(1 + O_1\left(\frac{4\sqrt{\epsilon}}{\pi}\right)\right) O_1(d\sqrt{\epsilon}) \\ &= O_1\left(\frac{4\sqrt{\epsilon}}{3\pi}\right) + O_1(d\sqrt{\epsilon}) + O_1\left(\frac{4d\epsilon}{\pi}\right) \\ &= O_1\left(\frac{(4 + 3d\pi + 12d)\sqrt{\epsilon}}{3\pi}\right) \end{aligned}$$

Thus since  $|\beta + \cos \bar{\theta}_0(r - \alpha)| \leq \epsilon M$  and  $M \leq 6d$ , we attain

$$\begin{aligned} & - \left(1 + O_1\left(\frac{4\sqrt{\epsilon}}{\pi}\right)\right) \left(1 + O_1\left(\frac{4d\sqrt{\epsilon}}{\pi}\right)\right) + (1 + O_1(2\epsilon)) \left(r + O_1\left(\frac{(4 + 3d\pi + 12d)\sqrt{\epsilon}}{3\pi}\right)\right) \\ &= O_1(6d\epsilon). \end{aligned}$$

Rearranging, this gives

$$\begin{aligned} r - 1 &= O_1\left(\frac{4d\sqrt{\epsilon}}{\pi} + \frac{4\sqrt{\epsilon}}{\pi} + \frac{16d\epsilon}{\pi} + (2\epsilon + 1)\frac{(4 + 3d\pi + 12d)\sqrt{\epsilon}}{3\pi}\right) + O_1(12d\epsilon) + O_1(6d\epsilon) \\ &= O_1\left(\frac{(12d + 12 + 48d)\sqrt{\epsilon} + (2\epsilon + 1)(4 + 3\pi d + 12d)\sqrt{\epsilon}}{3\pi} + 18d\sqrt{\epsilon}\right) \\ &= O_1(29d\sqrt{\epsilon}) \end{aligned}$$

where we used  $\epsilon < 1/2$  in the final equality.

**Large Angle Case:** Assume  $\bar{\theta}_0 = \pi + O_1(\delta)$  where  $\delta := 24d^4\pi^2\sqrt{\epsilon}$ . We first prove that  $\alpha$  is close to  $\rho_d$ . Recall that  $\bar{\theta}_d = \check{\theta}_d + O_1(d\delta)$ . Then by the mean value theorem:

$$|\sin \bar{\theta}_d - \sin \check{\theta}_d| \leq |\bar{\theta}_d - \check{\theta}_d| \leq d\delta$$

so  $\sin \bar{\theta}_d = \sin \check{\theta}_d + O_1(d\delta)$ . Let

$$\Gamma_d := \sum_{i=0}^{d-1} \frac{\sin \check{\theta}_i}{\pi} \left( \prod_{j=i+1}^{d-1} \frac{\pi - \check{\theta}_j}{\pi} \right).$$

Then note that

$$\rho_d = \frac{2 \sin \check{\theta}_d}{\pi} + \left( \frac{\pi - 2\check{\theta}_d}{\pi} \right) \Gamma_d.$$

In [20], it was shown that if  $d^2\delta/\pi \leq 1$ , then  $|\Gamma_d| \leq d$  and

$$\sum_{i=0}^{d-1} \frac{\sin \bar{\theta}_i}{\pi} \left( \prod_{j=i+1}^{d-1} \frac{\pi - \bar{\theta}_j}{\pi} \right) = \Gamma_d + O_1(3d^3\delta).$$

By the condition,  $d^2\delta/\pi \leq 1$ , we require

$$\sqrt{\epsilon} \leq \frac{1}{24\pi d^6}.$$

Thus for sufficiently small  $\epsilon$ , we have

$$\begin{aligned} \alpha &= \frac{2 \sin \bar{\theta}_d}{\pi} + \left( \frac{\pi - 2\bar{\theta}_d}{\pi} \right) \sum_{i=0}^{d-1} \frac{\sin \bar{\theta}_i}{\pi} \left( \prod_{j=i+1}^{d-1} \frac{\pi - \bar{\theta}_j}{\pi} \right) \\ &= \frac{2 \sin \check{\theta}_d}{\pi} + O_1\left(\frac{2d\delta}{\pi}\right) + \left( \frac{\pi - 2\check{\theta}_d}{\pi} + O_1\left(\frac{2d\delta}{\pi}\right) \right) (\Gamma_d + O_1(3d^3\delta)) \\ &= \rho_d + O_1\left(\frac{2d\delta}{\pi}\right) + \Gamma_d O_1\left(\frac{2d\delta}{\pi}\right) + \left( \frac{\pi - 2\check{\theta}_d}{\pi} \right) O_1(3d^3\delta) + O_1\left(\frac{6d^4\delta^2}{\pi}\right) \\ &= \rho_d + O_1\left(\frac{2d\delta}{\pi}\right) + O_1\left(\frac{2d^2\delta}{\pi}\right) + O_1(3d^3\delta) + O_1\left(\frac{6d^4\delta^2}{\pi}\right) \\ &= \rho_d + O_1\left(\left(\frac{4\delta}{\pi} + 3\delta + \frac{6\delta^2}{\pi}\right) d^4\right) \\ &= \rho_d + O_1(7d^4\delta). \end{aligned}$$

We now prove  $r$  is close to  $\rho_d$ . Since  $x \in S_{\epsilon, x_0}$ ,

$$|-\beta + \cos \bar{\theta}_0(r - \alpha)| \leq \epsilon M.$$

Also note that  $|\beta| \leq \delta/\pi$  by 33. Since  $\cos \bar{\theta}_0 = 1 + O_1(\bar{\theta}_0^2/2)$ , we have that

$$O_1(\delta/\pi) + (1 + O_1(\delta^2/2))(r - \rho_d + O_1(7d^4\delta)) = O_1(\epsilon M).$$

Using  $r \leq 6d$ ,  $\rho_d \leq 2d$ , and  $\delta = 24d^4\pi^2\sqrt{\epsilon} \leq 1$ , we get

$$\begin{aligned} r - \rho_d + O_1\left(\frac{\delta^2}{2}\right)(r - \rho_d) + O_1(7d^4\delta) + O_1\left(\frac{7d^4\delta^3}{2}\right) &= O_1(\epsilon M) + O_1\left(\frac{\delta}{\pi}\right) \\ \implies r - \rho_d &= O_1\left(4d\delta^2 + 7d^4\delta + \frac{7d^4\delta^3}{2} + 6d\epsilon + \frac{\delta}{\pi}\right) \\ &= O_1\left(6d\epsilon + \delta\left(4d + 7d^4 + \frac{7d^4}{2} + \frac{1}{\pi}\right)\right) \\ &= O_1\left(\left(6d + 24d^4\pi^2\left(4d + \frac{21d^4}{2} + \frac{1}{\pi}\right)\right)\sqrt{\epsilon}\right) \\ &= O_1(3517d^8\sqrt{\epsilon}). \end{aligned}$$

Finally, to complete the proof we use the inequality

$$\|x - x_0\| \leq |||x|| - \|x_0||| + (\|x_0\| + |||x|| - \|x_0|||)\bar{\theta}_0.$$

This inequality states that if a two dimensional point is known to be within  $\Delta r$  of magnitude  $r$  and an angle  $\Delta\theta$  away from 0, then it is at most a Euclidean distance of  $\Delta r + (r + \Delta r)\Delta\theta$  away from the point  $(r, 0)$  in polar coordinates. Thus for  $\bar{\theta}_0 = O_1(2\sqrt{\epsilon})$ , we have  $r = 1 + O_1(29d\sqrt{\epsilon})$  so

$$\|x - x_0\| \leq 29d\sqrt{\epsilon} + (1 + 29d\sqrt{\epsilon})2\sqrt{\epsilon} \leq 89d\sqrt{\epsilon}.$$

Then if  $\bar{\theta}_0 = \pi + O_1(24d^4\pi^2\sqrt{\epsilon})$ , note that  $\angle(x, -\rho_d x_0) = O_1(24d^4\pi^2\sqrt{\epsilon})$  and  $r = \rho_d + O_1(3517d^8\sqrt{\epsilon})$  so that

$$\begin{aligned}\|x + \rho_d x_0\| &\leq 3517d^8\sqrt{\epsilon} + (\rho_d + 3517d^8\sqrt{\epsilon})24d^4\pi^2\sqrt{\epsilon} \\ &\leq 3517d^8\sqrt{\epsilon} + (2d + 3517d^8\sqrt{\epsilon})24d^4\pi^2\sqrt{\epsilon} \\ &\leq 77422\pi^2d^{12}\sqrt{\epsilon}.\end{aligned}$$

Hence we attain

$$S_{\epsilon, x_0} \subset \mathcal{B}(x_0, 89d\sqrt{\epsilon}) \cup \mathcal{B}(-\rho_d x_0, 77422\pi^2d^{12}\sqrt{\epsilon}).$$

The result that  $\rho_d \rightarrow 1$  as  $d \rightarrow \infty$  follows from the following facts: by (36), we have that

$$\check{\theta}_d \leq \frac{3\pi}{d+3} \quad \forall d \geq 0 \implies \check{\theta}_d \rightarrow 0 \text{ as } d \rightarrow \infty.$$

Thus

$$\frac{2 \sin \check{\theta}_d}{\pi} \rightarrow 0 \text{ as } d \rightarrow \infty \text{ since } \check{\theta}_d \rightarrow 0 \text{ as } d \rightarrow \infty$$

and in [20], it was shown that

$$\sum_{i=0}^{d-1} \frac{\sin \check{\theta}_i}{\pi} \left( \prod_{j=i+1}^{d-1} \frac{\pi - \check{\theta}_j}{\pi} \right) \rightarrow 1 \text{ as } d \rightarrow \infty.$$

Hence

$$\left( \frac{\pi - 2\check{\theta}_d}{\pi} \right) \sum_{i=0}^{d-1} \frac{\sin \check{\theta}_i}{\pi} \left( \prod_{j=i+1}^{d-1} \frac{\pi - \check{\theta}_j}{\pi} \right) \rightarrow 1 \text{ as } d \rightarrow \infty$$

so  $\rho_d \rightarrow 1$  as  $d \rightarrow \infty$ . □

## 6 Appendix B: Gaussian Matrices Satisfy the RRCP

We set out to prove the following:

**Proposition 2.** Fix  $0 < \epsilon < 1$ . Let  $A \in \mathbb{R}^{m \times n_d}$  have i.i.d.  $\mathcal{N}(0, 1/m)$  entries. Then if  $m > \tilde{C}_\epsilon dk \log(n_1 n_2 \dots n_d)$ , then with probability at least  $1 - \tilde{\gamma} m^{4k+1} \exp(-\tilde{c}_\epsilon m)$ ,  $A$  satisfies the RRCP with constant  $\epsilon$ . Here  $\tilde{\gamma}$  is a positive universal constant,  $\tilde{c}_\epsilon$  depends on  $\epsilon$ , and  $\tilde{C}_\epsilon$  depends polynomially on  $\epsilon^{-1}$ .

To show that Gaussian  $A$  satisfies the RRCP, we first establish that for any fixed non-zero  $z, w \in \mathbb{R}^n$ , the inner product  $\langle A_z^\top A_w x, y \rangle$  concentrates around its expectation  $\langle \Phi_{z,w} x, y \rangle$  for all  $x$  and  $y$  in a fixed  $k$ -dimensional subspace of  $\mathbb{R}^n$ . As we will see by the end of this section, this fixed  $k$ -dimensional subspace will represent the range of our generative model. We first require a simple technical result that is proven in the subsequent section:

**Proposition 3.** Fix  $z, w \in \mathbb{R}^n \setminus \{0\}$  and  $0 < \epsilon < 1$ . Let  $T$  be a subspace of  $\mathbb{R}^n$ . If

$$|\langle A_z^\top A_w x, x \rangle - \langle \Phi_{z,w} x, x \rangle| \leq \epsilon \|x\|^2 \quad \forall x \in T \tag{37}$$

then

$$|\langle A_z^\top A_w x, y \rangle - \langle \Phi_{z,w} x, y \rangle| \leq 3\epsilon \|x\| \|y\| \quad \forall x, y \in T.$$

We now require a variation of the Restricted Isometry Property typically proven for Gaussian matrices. In our situation, the matrix  $A_z^\top A_w$  concentrates around  $\Phi_{z,w} \neq I_n$  for  $z \neq w$ , so we must prove a generalization which we call the *Restricted Concentration Property* (RCP). First, recall that for any  $z, w \in \mathbb{R}^n$ ,  $\mathbb{E}[A_z^\top A_w] = \Phi_{z,w}$ . In addition, we have that for any  $x \in \mathbb{R}^n$ ,

$$|\langle A_z^\top A_w x, x \rangle - \langle \Phi_{z,w} x, x \rangle| = \frac{1}{m} \left| \sum_{i=1}^m Y_i \right|$$

where

$$Y_i = X_i - \mathbb{E}[X_i] \text{ and } X_i = \text{sgn}(\langle a_i, z \rangle \langle a_i, w \rangle) \langle a_i, x \rangle^2.$$

Here each  $a_i$  denotes an unnormalized row of  $A$  in which  $a_i \sim \mathcal{N}(0, I_n)$ . Hence  $Y_i$  are independent, centered, subexponential random variables<sup>5</sup>. Thus they satisfy the following large deviation inequality:

**Lemma 5** (Corollary 5.17 in [32]). *Let  $Y_1, \dots, Y_m$  be independent, centered, subexponential random variables. Let  $K = \max_{i \in [m]} \|Y_i\|_{\psi_1}$ . Then for all  $\epsilon > 0$ ,*

$$\mathbb{P} \left( \frac{1}{m} \left| \sum_{i=1}^m Y_i \right| \geq \epsilon \right) \leq 2 \exp \left[ -c \min \left( \frac{\epsilon^2}{K^2}, \frac{\epsilon}{K} \right) m \right]$$

where  $c > 0$  is an absolute constant. Here  $\|\cdot\|_{\psi_1}$  is the subexponential norm:  $\|X\|_{\psi_1} := \sup_{p \geq 1} p^{-1} (\mathbb{E} |X|^p)^{1/p}$ .

Fix  $x \in \mathcal{S}^{n-1}$ . Recall that the subexponential norm satisfies

$$\|Y_i\|_{\psi_1} = \|X_i - \mathbb{E}[X_i]\|_{\psi_1} \leq 2\|X_i\|_{\psi_1}.$$

Let  $Z_i := \langle a_i, x \rangle \sim \mathcal{N}(0, 1)$ . Recall that  $\|Z_i\|_{\psi_2} \leq K_1$  for some absolute constant  $K_1$  where  $\|\cdot\|_{\psi_2}$  is the sub-gaussian norm. Observe that  $\mathbb{E} |X_i|^p \leq \mathbb{E} |Z_i^2|^p$ . Thus by Lemma 5.14 in [32], we have

$$\|Y_i\|_{\psi_1} \leq 2\|X_i\|_{\psi_1} \leq 2\|Z_i^2\|_{\psi_1} \leq 4\|Z_i\|_{\psi_2}^2 \leq 4K_1^2.$$

Thus  $K = \max_{i \in [m]} \|Y_i\|_{\psi_1} \leq 4K_1^2$  for an absolute constant  $K_1$ . Defining  $K_2 := 4K_1^2$ , Lemma 5 guarantees that for any fixed  $z, w \in \mathbb{R}^n \setminus \{0\}$  and  $\epsilon > 0$ ,

$$\mathbb{P}(|\langle A_z^\top A_w x, x \rangle - \langle \Phi_{z,w} x, x \rangle| \geq \epsilon) \leq 2 \exp(-c_0(\epsilon)m) \quad (38)$$

where  $c_0(\epsilon) = c \min(\epsilon^2/K_2^2, \epsilon/K_2)$ . We are now equipped to proceed with the proof of the RCP.

**Proposition 4** (Variant of Lemma 5.1 in [3]: RCP). *Fix  $0 < \epsilon < 1$  and  $k < m$ . Let  $A \in \mathbb{R}^{m \times n}$  have i.i.d.  $\mathcal{N}(0, 1/m)$  entries and fix  $z, w \in \mathbb{R}^n \setminus \{0\}$ . Let  $T \subset \mathbb{R}^n$  be a  $k$ -dimensional subspace. Then if  $m \geq \tilde{c}k$ , we have that with probability exceeding  $1 - 2 \exp(-c_1 m)$ ,*

$$|\langle A_z^\top A_w x, x \rangle - \langle \Phi_{z,w} x, x \rangle| \leq \epsilon \|x\|^2 \quad \forall x \in T \quad (39)$$

and

$$|\langle A_z^\top A_w x, y \rangle - \langle \Phi_{z,w} x, y \rangle| \leq 3\epsilon \|x\| \|y\| \quad \forall x, y \in T. \quad (40)$$

Furthermore, let  $U = \bigcup_{i=1}^M U_i$  and  $V = \bigcup_{j=1}^N V_j$  where  $U_i$  and  $V_j$  are subspaces of  $\mathbb{R}^n$  of dimension at most  $k$  for all  $i \in [M]$  and  $j \in [N]$ . Then if  $m \geq \tilde{c}k$

$$|\langle A_z^\top A_w u, v \rangle - \langle \Phi_{z,w} u, v \rangle| \leq 3\epsilon \|u\| \|v\| \quad \forall u \in U, v \in V, \quad (41)$$

with probability exceeding  $1 - 2MN \exp(-c_1 m)$ . Here  $c_1$  only depends on  $\epsilon$  and  $\tilde{c} = \Omega(\epsilon^{-1} \log \epsilon^{-1})$ .

*Proof.* Fix  $0 < \epsilon < 1$  and  $k < m$ . Since  $A$  is Gaussian, we may take  $T$  to be in the span of the first  $k$  standard basis vectors. In addition, assume  $\|x\| = 1$  for any  $x \in T$ . For notational simplicity, set  $\Sigma_{z,w} := A_z^\top A_w - \Phi_{z,w}$ . Choose a finite set of points  $Q_T \subset T$  each with unit norm such that  $|Q_T| \leq (42/\epsilon)^k$  and for any  $x \in T$ ,

$$\min_{q \in Q_T} \|x - q\| \leq \frac{\epsilon}{14}. \quad (42)$$

See [11] for a proof of such a construction. Then we may apply a union bound to (38) for this set of points to attain

$$\mathbb{P} \left( |\langle \Sigma_{z,w} q, q \rangle| \geq \frac{\epsilon}{8} \quad \forall q \in Q_T \right) \leq 2 \left( \frac{42}{\epsilon} \right)^k \exp \left( -c_0 \left( \frac{\epsilon}{8} \right) m \right). \quad (43)$$

<sup>5</sup>Recall that if  $a \sim \mathcal{N}(0, I_n)$ ,  $\langle a, x \rangle \sim \mathcal{N}(0, \|x\|^2)$ . Since any Gaussian random variable is sub-gaussian and any squared sub-gaussian random variable is subexponential,  $\langle a, x \rangle^2$  is subexponential. The terms involving  $\text{sgn}(\cdot)$  do not effect the tail of  $\langle a, x \rangle^2$ .

Now, define

$$\alpha^* := \inf \{ \alpha > 0 : |\langle \Sigma_{z,w} x, x \rangle| \leq \alpha \|x\|^2 \forall x \in T \}. \quad (44)$$

We want to show that  $\alpha^* \leq \epsilon$ . Fix  $x \in T$  with unity norm. Then there exists a  $q \in Q_T$  with  $\|q\| = 1$  such that  $\|x - q\| \leq \epsilon/14$ . In addition, observe that  $x - q \in T$  since  $q \in Q_T \subset T$  so by (44),

$$|\langle \Sigma_{z,w}(x - q), x - q \rangle| \leq \alpha^* \|x - q\|^2 \leq \alpha^* \frac{\epsilon^2}{196}. \quad (45)$$

Now, note that by the definition of  $\alpha^*$ ,

$$|\langle \Sigma_{z,w} x, x \rangle| \leq \alpha^* \forall x \in T.$$

Thus Proposition 3 gives

$$|\langle \Sigma_{z,w} x, y \rangle| \leq 3\alpha^* \forall x, y \in T.$$

Applying this result to  $x - q$  and  $q$  gives

$$|\langle \Sigma_{z,w}(x - q), q \rangle| \leq 3\alpha^* \|x - q\| \leq \alpha^* \frac{3\epsilon}{14}. \quad (46)$$

Using  $\langle \Sigma_{z,w} x, x \rangle = \langle \Sigma_{z,w}(x - q), x - q \rangle + 2\langle \Sigma_{z,w} x, q \rangle - \langle \Sigma_{z,w} q, q \rangle$  and  $\langle \Sigma_{z,w} x, q \rangle = \langle \Sigma_{z,w}(x - q), q \rangle + \langle \Sigma_{z,w} q, q \rangle$ , we see that

$$\begin{aligned} |\langle \Sigma_{z,w} x, x \rangle| &\leq |\langle \Sigma_{z,w}(x - q), x - q \rangle| + 2|\langle \Sigma_{z,w} x, q \rangle| + |\langle \Sigma_{z,w} q, q \rangle| \\ &\leq |\langle \Sigma_{z,w}(x - q), x - q \rangle| + 2|\langle \Sigma_{z,w}(x - q), q \rangle| + 3|\langle \Sigma_{z,w} q, q \rangle| \\ &\leq \alpha^* \frac{\epsilon^2}{196} + \alpha^* \frac{3\epsilon}{7} + \frac{3\epsilon}{8} \\ &= \alpha^* \left( \frac{\epsilon^2}{196} + \frac{3\epsilon}{7} \right) + \frac{3\epsilon}{8} \end{aligned}$$

where we used (45), (46), and (43) in the second inequality. Note that this bound can be derived for any  $x \in T$  because we can always find a  $q \in Q_T$  with  $\|q\| = 1$  such that  $\|x - q\| \leq \epsilon/14$ . Thus

$$|\langle \Sigma_{z,w} x, x \rangle| \leq \alpha^* \left( \frac{\epsilon^2}{196} + \frac{3\epsilon}{7} \right) + \frac{3\epsilon}{8} \forall x \in T. \quad (47)$$

However, recall that  $\alpha^*$  was defined to be the smallest number such that

$$|\langle \Sigma_{z,w} x, x \rangle| \leq \alpha^* \forall x \in T.$$

Hence  $\alpha^*$  must be smaller than the right hand side of (47), i.e.

$$\alpha^* \leq \alpha^* \left( \frac{\epsilon^2}{196} + \frac{3\epsilon}{7} \right) + \frac{3\epsilon}{8} \implies \alpha^* \leq \frac{3\epsilon}{8} \left( \frac{1}{1 - \frac{\epsilon^2}{196} - \frac{3\epsilon}{7}} \right) \leq \epsilon$$

since  $0 < \epsilon < 1$ . Hence we conclude that with probability exceeding  $1 - 2(42/\epsilon)^k \exp(-c_0(\epsilon/8)m)$ ,

$$|\langle \Sigma_{z,w} x, x \rangle| \leq \epsilon \|x\|^2 \forall x \in T$$

i.e.

$$|\langle A_z^\top A_w x, x \rangle - \langle \Phi_{z,w} x, x \rangle| \leq \epsilon \|x\|^2 \forall x \in T.$$

The probability bound in the proposition can be shown by noting that

$$1 - 2(42/\epsilon)^k \exp(-c_0(\epsilon/8)m) = 1 - 2 \exp \left( -c_0(\epsilon/8)m + k \log \left( \frac{42}{\epsilon} \right) \right).$$

Thus if

$$\frac{2}{c_0(\epsilon/8)} \log \left( \frac{42}{\epsilon} \right) k \leq \tilde{c}k \leq m$$

where  $\tilde{c} = \Omega(\epsilon^{-1} \log \epsilon^{-1})$ , we have that the result holds with probability exceeding

$$1 - 2 \exp \left( -c_0(\epsilon/8)m + k \log \left( \frac{42}{\epsilon} \right) \right) \geq 1 - 2 \exp(-c_1 m)$$

where  $c_1 = c_0(\epsilon/8)/2$ . Applying Proposition 3 to our result gives (41) with the same probability. The extension to the union of subspaces follows by applying (41) to all subspaces of the form  $\text{span}(U_i, V_j)$  and using a union bound.  $\square$

Now, this result establishes the concentration of  $\langle A_z^\top A_w x, y \rangle$  around  $\langle \Phi_{z,w} x, y \rangle$  for  $x$  and  $y$  in a fixed  $k$ -dimensional subspace for *fixed*  $z, w \in \mathbb{R}^n \setminus \{0\}$ . However, in reality, we are interested in showing that this concentration holds for all  $z$  and  $w$  in the range of our generative model. Hence we require an extension of the RCP, which holds uniformly for all  $z$  and  $w$  in (possibly) different  $k$ -dimensional subspaces. We will refer to this result as the Uniform RCP. The proof of this result uses an interesting fact from 1-bit compressed sensing which establishes that if a sufficient number of random hyperplanes cut the unit sphere, the diameter of each tessellation is small with high probability [30]. We state the theorem here for convenience:

**Theorem 4** (Theorem 2.1 in [30]). *Let  $n, m, s > 0$  and set  $\delta = C_1 \left(\frac{s}{m} \log(2n/s)\right)^{1/5}$ . Let  $a_i \in \mathbb{R}^n$  have i.i.d.  $\mathcal{N}(0, 1)$  entries for  $i \in [m]$ . Then with probability at least  $1 - C_2 \exp(-c\delta m)$ , the following holds uniformly for all  $x, \tilde{x} \in \mathbb{R}^n$  that satisfy  $\|x\|_2 = \|\tilde{x}\|_2 = 1$ ,  $\|x\|_1 \leq \sqrt{s}$ , and  $\|\tilde{x}\|_1 \leq \sqrt{s}$  for  $s \leq n$ :*

$$\langle a_i, \tilde{x} \rangle \langle a_i, x \rangle \geq 0, i \in [m] \implies \|\tilde{x} - x\|_2 \leq \delta. \quad (48)$$

Here  $C_1, C_2, c$  are positive universal constants.

We will use this result to prove the following: given a sufficient number of random hyperplanes and a  $k$ -dimensional subspace  $Z$ , there exists a finite set of points  $Z_0$  such that any point in  $Z$  can be closely approximated by a point in  $Z_0$  with high probability.

**Lemma 6.** *Fix  $0 < \epsilon < 1$ . Let  $A \in \mathbb{R}^{m \times n}$  have i.i.d.  $\mathcal{N}(0, 1/m)$  entries with rows  $\{a_\ell\}_{\ell=1}^m$ . Let  $Z \subset \mathbb{R}^n$  be a  $k$ -dimensional subspace. Then if  $m \geq c_\epsilon k$ , there exists a set of points*

$$Z_0 := \{z_i \in Z : \|z_i\| = 1 \text{ and } a_\ell^\top z_i \neq 0 \forall \ell \in [m], i \in I\} \quad (49)$$

where  $I$  is a finite index set such that the following event holds with probability exceeding  $1 - C_2 \exp(-c\epsilon m)$ :

$$E_{Z,A} := \{|I| \leq 10m^{2k} \text{ and } \forall z \in Z \text{ s.t. } \|z\| = 1, \exists z_i \in Z_0 \text{ s.t. } \|z - z_i\| \leq \epsilon\}. \quad (50)$$

Here  $C_2$  and  $c$  are positive absolute constants and  $c_\epsilon$  depends polynomially on  $\epsilon^{-1}$ .

*Proof of Lemma 6.* By the rotational invariance of the Gaussian distribution, we may take  $Z$  to be in the span of the first  $k$  standard basis vectors. We may further without loss of generality assume  $A \in \mathbb{R}^{m \times k}$ . Define  $Z_0$  and  $E_{Z,A}$  as in (49) and (50). We will evoke the following lemma which establishes that the unit sphere of  $Z$  is partitioned into at most  $10m^{2k}$  regions by the rows  $\{a_\ell\}_{\ell=1}^m$  of  $A$  with probability 1:

**Lemma 7.** *Let  $V$  be a subspace of  $\mathbb{R}^n$ . Let  $A \in \mathbb{R}^{m \times n}$  have i.i.d.  $\mathcal{N}(0, 1/m)$  entries. With probability 1,*

$$|\{\text{diag}(\text{sgn}(Av))A : v \in V\}| \leq 10m^{2 \dim V}.$$

Now, choose  $\{z_i\}_{i \in I}$  as a set of representative points in the interior of each region partitioned by the rows  $\{a_\ell\}_{\ell=1}^m$  of  $A$ . By Lemma 7, the number of such points is bounded with probability 1:  $|I| \leq 10m^{2k}$ . Then, to use Theorem 4, observe that we can set  $n = s = k$  since  $A \in \mathbb{R}^{m \times k}$  and  $Z$  is in the span of the first  $k$  standard basis vectors. Then if  $m \geq (C_1^5 \log(2)/\epsilon^5) k := c_\epsilon k$ , we have that the quantity  $\delta$  in the theorem is bounded by  $\epsilon$ :

$$\delta := C_1 \left( \frac{k}{m} \log(2) \right)^{1/5} \leq \epsilon$$

so  $\mathbb{P}(E_{Z,A}) \geq 1 - C_2 \exp(-c\epsilon m)$  for some positive universal constants  $c, C_1$ , and  $C_2$  and  $c_\epsilon$  depends polynomially on  $\epsilon^{-1}$ .  $\square$

We now proceed with the proof of the Uniform RCP.

**Proposition 5** (Uniform RCP). *Fix  $0 < \epsilon < 1$  and  $k < m$ . Let  $A \in \mathbb{R}^{m \times n}$  have i.i.d.  $\mathcal{N}(0, 1/m)$  entries. Let  $Z, W$ , and  $T$  be fixed  $k$ -dimensional subspaces of  $\mathbb{R}^n$ . Then if  $m \geq 2C_\epsilon k$ , then with probability at least  $1 - 3\gamma m^{4k+1} \exp(-\tilde{c}_\epsilon m)$ , we have*

$$|\langle A_z^\top A_w x, y \rangle - \langle \Phi_{z,w} x, y \rangle| \leq L\epsilon \|x\| \|y\| \forall x, y \in T, z \in Z, w \in W \quad (51)$$



where  $\gamma$  is a positive universal constant,  $\tilde{c}_\epsilon$  depends on  $\epsilon$  and  $C_\epsilon$  depends polynomially on  $\epsilon^{-1}$ . Furthermore, let  $U = \bigcup_{i=1}^M U_i$  and  $V = \bigcup_{j=1}^N V_j$  where  $U_i$  and  $V_j$  are subspaces of  $\mathbb{R}^n$  of dimension at most  $k$  for all  $i \in [M]$  and  $j \in [N]$ . Then if  $m \geq 2C_\epsilon k$ ,

$$|\langle A_z^\top A_w u, v \rangle - \langle \Phi_{z,w} u, v \rangle| \leq L\epsilon \|u\| \|v\| \quad \forall u \in U, v \in V, z \in Z, w \in W \quad (52)$$

with probability exceeding  $1 - 3MN\gamma m^{4k+1} \exp(-\tilde{c}_\epsilon m)$ . Here  $L$  is a positive universal constant.

*Proof.* Define  $Z_0$  and  $E_{Z,A}$  as in (49) and (50). One can define the analogous set

$$W_0 := \{w_j \in W : \|w_j\| = 1 \text{ and } a_\ell^\top w_j \neq 0 \quad \forall \ell \in [m], j \in J\} \quad (53)$$

for some finite index set  $J$ , choosing the points in  $W_0$  in precisely the same way as in  $Z_0$ . We also define the analogous event

$$E_{W,A} := \{|J| \leq 10m^{2k} \text{ and } \forall w \in W \text{ s.t. } \|w\| = 1, \exists w_j \in W_0 \text{ s.t. } \|w - w_j\| \leq \epsilon\}. \quad (54)$$

By Lemma 6, we have that if  $m \geq c_\epsilon k$ ,  $\mathbb{P}(E_{Z,A}) \geq 1 - C_2 \exp(-c_\epsilon m)$ . The event  $E_{W,A}$  holds with the same probability so we have that if  $m \geq c_\epsilon k$ ,

$$\mathbb{P}(E_{Z,A} \cap E_{W,A}) \geq 1 - 2C_2 \exp(-c_\epsilon m)$$

For the remainder of this proof, we work on the event  $E_{Z,A} \cap E_{W,A}$ . Fix  $z \in Z$  and  $w \in W$ . Define the following set:

$$\Omega_{z,w} := \{\ell \in [m] : a_\ell^\top z = 0 \text{ or } a_\ell^\top w = 0\}.$$

Note that since  $Z$  and  $W$  are  $k$ -dimensional and any subset of  $k$  rows of  $A$  are linearly independent with probability 1, at most  $k$  entries of either  $Az$  or  $Aw$  are zero.<sup>6</sup> Hence  $|\Omega_{z,w}| \leq 2k$ . Furthermore, observe that

$$\begin{aligned} A_z^\top A_w &= \sum_{\ell=1}^m \text{sgn}(\langle a_\ell, z \rangle \langle a_\ell, w \rangle) a_\ell a_\ell^\top \\ &= \sum_{\ell \in \Omega_{z,w}^c} \text{sgn}(\langle a_\ell, z \rangle \langle a_\ell, w \rangle) a_\ell a_\ell^\top + \sum_{\ell \in \Omega_{z,w}} \text{sgn}(\langle a_\ell, z \rangle \langle a_\ell, w \rangle) a_\ell a_\ell^\top \\ &= \sum_{\ell \in \Omega_{z,w}^c} \text{sgn}(\langle a_\ell, z \rangle \langle a_\ell, w \rangle) a_\ell a_\ell^\top \end{aligned}$$

by the definition of  $\Omega_{z,w}$ . However, on the event  $E_{Z,A} \cap E_{W,A}$ , there exists a  $z_i \in Z_0$  and  $w_j \in W_0$  for some  $i \in I$  and  $j \in J$  such that for all  $\ell \in \Omega_{z,w}^c$ ,

$$\text{sgn}(\langle a_\ell, z \rangle \langle a_\ell, w \rangle) = \text{sgn}(\langle a_\ell, z_i \rangle \langle a_\ell, w_j \rangle)$$

i.e.  $z$  and  $z_i$  (likewise  $w$  and  $w_j$ ) lie on the same side and interior of each hyperplane for which  $z$  (or  $w$ ) is not orthogonal to. Hence we have

$$A_z^\top A_w = \sum_{\ell \in \Omega_{z,w}^c} \text{sgn}(\langle a_\ell, z \rangle \langle a_\ell, w \rangle) a_\ell a_\ell^\top = \sum_{\ell \in \Omega_{z,w}^c} \text{sgn}(\langle a_\ell, z_i \rangle \langle a_\ell, w_j \rangle) a_\ell a_\ell^\top := \tilde{A}_{z_i}^\top \tilde{A}_{w_j}.$$

We now use the following lemma which says that if  $|\Omega_{z,w}| \leq 2k$  total rows of  $A_{z_i}$  and  $A_{w_j}$  are deleted, we can still establish the RCP:

**Lemma 8.** Fix  $0 < \epsilon < 1$  and  $k < m$ . Suppose that  $A \in \mathbb{R}^{m \times n}$  has i.i.d.  $\mathcal{N}(0, 1/m)$  entries. Let  $T \subset \mathbb{R}^n$  be a  $k$ -dimensional subspace and define  $Z_0$  and  $W_0$  as in (49) and (53). Then if  $m \geq 2\delta_\epsilon^{-1} \tilde{c}k$ , the following holds simultaneously for all  $\Omega \subset [m]$  satisfying  $|\Omega| \leq 2k \leq \delta_\epsilon m$  with probability at least  $1 - \gamma m^{4k+1} \exp(-\frac{c_1 m}{4})$ :

$$\left| \langle \tilde{A}_{z_i}^\top \tilde{A}_{w_j} x, y \rangle - \langle \Phi_{z_i, w_j} x, y \rangle \right| \leq 3\epsilon \|x\| \|y\| \quad \forall x, y \in T, \quad \forall i \in I, j \in J \quad (55)$$

where

$$\tilde{A}_{z_i}^\top \tilde{A}_{w_j} := \sum_{\ell \in \Omega^c} \text{sgn}(\langle a_\ell, z_i \rangle \langle a_\ell, w_j \rangle) a_\ell a_\ell^\top.$$

Here  $\gamma$  is a positive absolute constant,  $c_1$  depends on  $\epsilon$ ,  $\tilde{c} = \Omega(\epsilon^{-1} \log \epsilon^{-1})$ , and  $\delta_\epsilon^{-1}$  depends polynomially on  $\epsilon^{-1}$ .

<sup>6</sup>This is shown in the proof of Lemma 7.

*Proof of Lemma 8.* Fix  $\Omega \subset [m]$  satisfying  $|\Omega| \leq 2k$ . For  $\delta_\epsilon < 1/2$ , observe that the assumption  $m \geq 2\tilde{c}k$  implies that  $|\Omega^c| \geq m/2 \geq \tilde{c}k$ . Thus the RCP guarantees that with probability exceeding

$$1 - 2 \exp(-c_1 |\Omega^c|) \geq 1 - 2 \exp\left(-\frac{c_1 m}{2}\right)$$

we have that the following holds for fixed  $z_i \in Z_0$  and  $w_j \in W_0$ :

$$\left| \left\langle \tilde{A}_{z_i}^\top \tilde{A}_{w_j} x, y \right\rangle - \langle \Phi_{z_i, w_j} x, y \rangle \right| \leq 3\epsilon \|x\| \|y\| \quad \forall x, y \in T.$$

Furthermore, a union bound over all  $\{z_i\}_{i \in I}$  and  $\{w_j\}_{j \in J}$  gives

$$\left| \left\langle \tilde{A}_{z_i}^\top \tilde{A}_{w_j} x, y \right\rangle - \langle \Phi_{z_i, w_j} x, y \rangle \right| \leq 3\epsilon \|x\| \|y\| \quad \forall x, y \in T, \quad i \in I, \quad j \in J \quad (56)$$

with probability at least

$$1 - 2|I||J| \exp\left(-\frac{c_1 m}{2}\right) \geq 1 - \gamma m^{4k} \exp\left(-\frac{c_1 m}{2}\right)$$

where  $\gamma$  is a positive absolute constant and  $c_1$  depends on  $\epsilon$ . The number of subsets of  $[m]$  of size  $\lfloor \delta_\epsilon m \rfloor$  is

$$\binom{m}{\lfloor \delta_\epsilon m \rfloor} \leq \left(\frac{em}{\delta_\epsilon m}\right)^{\delta_\epsilon m} = \left[\left(\frac{e}{\delta_\epsilon}\right)^{\delta_\epsilon}\right]^m$$

We now determine a sufficiently small  $\delta_\epsilon$  such that

$$\left(\frac{e}{\delta_\epsilon}\right)^{\delta_\epsilon} \leq \exp\left(\frac{c_1}{4}\right) \quad (57)$$

where  $c_1 = c_0(\epsilon/8)/2 = (c/2) \min((\epsilon/8)^2/K_2^2, (\epsilon/8)/K_2)$  for absolute constants  $c$  and  $K_2$ . Since  $0 < \epsilon < 1$ , we have that

$$\frac{c_1}{4} \geq \frac{c}{8} \min\left(\frac{1}{(8K_2)^2}, \frac{1}{8K_2}\right) \epsilon^2 := R\epsilon^2.$$

Then if  $\delta_\epsilon$  satisfies

$$0 \leq \exp(R\epsilon^2 - \delta_\epsilon) - \frac{1}{\delta_\epsilon^{\delta_\epsilon}} \implies \left(\frac{e}{\delta_\epsilon}\right)^{\delta_\epsilon} \leq \exp(R\epsilon^2) \leq \exp\left(\frac{c_1}{4}\right).$$

However, note that the function

$$\psi(t) := \exp(t - (t/2)^2) - \frac{1}{(t/2)^{2(t/2)^2}} \geq 0 \quad \forall t > 0.$$

A plot of this function is given in Figure 5. Thus  $\psi(R\epsilon^2) \geq 0$  so if we take  $\delta_\epsilon := (R\epsilon^2/2)^2$ , we have that (57) holds.

Defining  $\delta_\epsilon$  in this way we have that

$$\binom{m}{\lfloor \delta_\epsilon m \rfloor} \leq \exp\left(\frac{c_1 m}{4}\right). \quad (58)$$

Thus, provided  $m \geq 2\delta_\epsilon^{-1}\tilde{c}k$  and applying a union bound, the result holds for all subsets  $\Omega \subset [m]$  satisfying  $|\Omega| \leq 2k \leq \lfloor \delta_\epsilon m \rfloor$  with probability

$$\begin{aligned} 1 - \sum_{\ell=1}^{\lfloor \delta_\epsilon m \rfloor} \binom{m}{\ell} \gamma m^{4k} \exp\left(-\frac{c_1 m}{2}\right) &\geq 1 - \lfloor \delta_\epsilon m \rfloor \binom{m}{\lfloor \delta_\epsilon m \rfloor} \gamma m^{4k} \exp\left(-\frac{c_1 m}{2}\right) \\ &\geq 1 - \gamma \lfloor \delta_\epsilon m \rfloor m^{4k} \exp\left(-\frac{c_1 m}{2} + \frac{c_1 m}{4}\right) \\ &\geq 1 - \gamma m^{4k+1} \exp\left(-\frac{c_1 m}{4}\right) \end{aligned}$$

where we used (58) in the second inequality.  $\square$

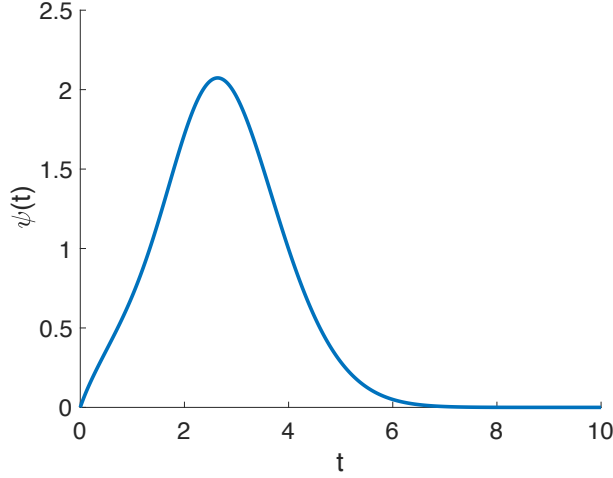

Figure 5: Plot of the function  $\psi(t) = \exp(t - (t/2)^2) - \frac{1}{(t/2)^2(t/2)^2}$ .

We return to the proof of Proposition 5. Let  $C_\epsilon := \delta_\epsilon^{-1} \max\{c_\epsilon, \tilde{c}\}$ . Then if  $m \geq 2C_\epsilon k \geq 2\tilde{c}k$ , Lemma 8 and the event  $E_{Z,A} \cap E_{W,A}$  holds with probability exceeding

$$\begin{aligned} \mathbb{P}(\text{Lemma 8} \cap (E_{Z,A} \cap E_{W,A})) &\geq 1 - 2C_2 \exp(-c_\epsilon m) - \gamma m^{4k+1} \exp\left(-\frac{c_1 m}{4}\right) \\ &\geq 1 - 3\gamma m^{4k+1} \exp(-\tilde{c}_\epsilon m) \end{aligned}$$

where  $\gamma$  is a positive absolute constant and  $\tilde{c}_\epsilon$  depends on  $\epsilon$ . On this event, we have that for all  $z \in Z$  and  $w \in W$  with  $\|z\| = \|w\| = 1$ , there exists a  $z_i \in Z_0$  and  $w_j \in W_0$  for some  $i \in I$  and  $j \in J$  with  $\|z_i\| = \|w_j\| = 1$  such that for any  $x, y \in T$ ,

$$\begin{aligned} |\langle A_z^\top A_w x, y \rangle - \langle \Phi_{z,w} x, y \rangle| &= |\langle \tilde{A}_{z_i}^\top \tilde{A}_{w_j} x, y \rangle - \langle \Phi_{z,w} x, y \rangle| \\ &\leq |\langle \tilde{A}_{z_i}^\top \tilde{A}_{w_j} x, y \rangle - \langle \Phi_{z_i, w_j} x, y \rangle| + |\langle \Phi_{z_i, w_j} x, y \rangle - \langle \Phi_{z,w} x, y \rangle| \\ &\leq 3\epsilon \|x\| \|y\| + \frac{88}{\pi} \epsilon \|x\| \|y\| \\ &:= L\epsilon \|x\| \|y\| \end{aligned}$$

where we used (55) and the continuity of  $\Phi_{z,w}$  from Lemma 9 in the second inequality. The extension to the union of subspaces follows by applying (51) to all subspaces of the form  $\text{span}(U_i, V_j)$  and using a union bound.  $\square$

With the Uniform RCP, we may now prove the RRCP:

**Proposition 6** (Range Restricted Concentration Property (RRCP)). *Fix  $0 < \epsilon < 1$ . Let  $W_i \in \mathbb{R}^{n_i \times n_{i-1}}$  have i.i.d.  $\mathcal{N}(0, 1/n_i)$  entries for  $i = 1, \dots, d$ . Let  $A \in \mathbb{R}^{m \times n_d}$  have i.i.d.  $\mathcal{N}(0, 1/m)$  entries independent from  $\{W_i\}$ . Then if  $m > \tilde{C}_\epsilon dk \log(n_1 n_2 \dots n_d)$ , then with probability at least  $1 - \tilde{\gamma} m^{4k+1} \exp(-\frac{\tilde{c}_\epsilon}{2} m)$ , we have that for all  $x, y \in \mathbb{R}^k$ ,*

$$\|(\Pi_{i=d}^1 W_{i,+} x)^\top (A_{x_d}^\top A_{y_d} - \Phi_{x_d, y_d}) (\Pi_{i=d}^1 W_{i,+} y)\| \leq L\epsilon \prod_{i=1}^d \|W_{i,+} x\| \|W_{i,+} y\|$$

where

$$x_d := (\Pi_{i=d}^1 W_{i,+} x) x \text{ and } y_d := (\Pi_{i=d}^1 W_{i,+} y) y.$$

Here  $\tilde{\gamma}$  and  $L$  are positive universal constants,  $\tilde{c}_\epsilon$  depends on  $\epsilon$ , and  $\tilde{C}_\epsilon$  depends polynomially on  $\epsilon^{-1}$ .

*Proof.* It suffices to show that for all  $x, y, w, v \in \mathcal{S}^{k-1}$ ,

$$\left| \langle (A_{x_d}^\top A_{y_d} - \Phi_{x_d, y_d})(\Pi_{i=d}^1 W_{i,+,x})w, (\Pi_{i=d}^1 W_{i,+,y})v \rangle \right| \leq L\epsilon \prod_{i=1}^d \|W_{i,+,x}\| \|W_{i,+,y}\|. \quad (59)$$

We will use (52) from Proposition 5. We first consider the  $d = 2$  layer case for simplicity. Fix  $W_1 \in \mathbb{R}^{n_1 \times k}$  and  $W_2 \in \mathbb{R}^{n_2 \times n_2}$ . It has been shown in Lemma 15 of [20] that there exists an event  $E$  over  $(W_1, W_2)$  with  $\mathbb{P}(E) = 1$  such that

$$|\{W_{1,+,x} : x \neq 0\}| \leq 10n_1^k \text{ and } |\{W_{2,+,x} : x \neq 0\}| \leq 10^2 n_2^k n_1^k.$$

Thus on the event  $E$ , we have that the following holds with probability 1:

$$|\{W_{2,+,x} W_{1,+,x} : x \neq 0\}| \leq 10^3 (n_1^2 n_2)^k.$$

Note that  $\dim(\text{range}(W_{2,+,x} W_{1,+,x})) \leq k$  for all  $x \neq 0$ . Hence it follows that

$$\{W_{2,+,x} W_{1,+,x} w : x, w \in \mathcal{S}^{k-1}\} \subseteq U = \bigcup_{i=1}^M U_i$$

where  $M \leq 10^3 (n_1^2 n_2)^k$ . By the same logic, we see that

$$\{W_{2,+,y} W_{1,+,y} v : y, v \in \mathcal{S}^{k-1}\} \subseteq V = \bigcup_{j=1}^N V_j$$

where  $N \leq 10^3 (n_1^2 n_2)^k$ . Thus by applying (52) to  $Z = \text{range}(W_{2,+,x} W_{1,+,x})$ ,  $W = \text{range}(W_{2,+,y} W_{1,+,y})$ ,  $U$  and  $V$ , we see that if  $m \geq 2C_\epsilon k$ , the  $d = 2$  layer variant of (59) holds for fixed  $W_1$  and  $W_2$  with probability exceeding

$$1 - 3MN\gamma m^{4k+1} \exp(-\tilde{c}_\epsilon m) \geq 1 - 3(10^3)^2 (n_1^2 n_2)^{2k} \gamma m^{4k+1} \exp(-\tilde{c}_\epsilon m).$$

Let  $\tilde{\gamma} = 3(10^3)^2 \gamma$ . Observe that if  $m \geq 2\hat{C}C_\epsilon \tilde{c}_\epsilon^{-1} k \log(n_1 n_2) := \tilde{C}_\epsilon k \log(n_1 n_2)$  for some positive absolute constant  $\hat{C}$ , then

$$\begin{aligned} 1 - 3(10^3)^2 (n_1^2 n_2)^{2k} \gamma m^{4k+1} \exp(-\tilde{c}_\epsilon m) &= 1 - \tilde{\gamma} m^{4k+1} \exp(-\tilde{c}_\epsilon m + 2k \log(n_1^2 n_2)) \\ &\geq 1 - \tilde{\gamma} m^{4k+1} \exp\left(-\frac{\tilde{c}_\epsilon}{2} m\right). \end{aligned}$$

Here  $\tilde{\gamma}$  and  $\hat{C}$  are positive absolute constants,  $\tilde{c}_\epsilon$  depends on  $\epsilon$ , and  $\tilde{C}_\epsilon := 2\hat{C}C_\epsilon \tilde{c}_\epsilon^{-1}$  depends polynomially on  $\epsilon^{-1}$ . Then, for random  $(W_1, W_2)$ , we have that by the independence of  $A$  and  $(W_1, W_2)$ , the  $d = 2$  layer variant of the RRCP holds with the same probability.

The  $d$  layer case is shown with precisely the same argument. It has been shown in Lemma 15 of [20] that

$$|\{\Pi_{i=d}^1 W_{i,+,x} : x \neq 0\}| \leq 10^{d^2} (n_1^d n_2^{d-1} \dots n_{d-1}^2 n_d)^k.$$

Hence it follows that  $\{(\Pi_{i=d}^1 W_{i,+,x})w : x, w \in \mathcal{S}^{k-1}\} \subseteq U$  where  $U$  is the union of at most  $10^{d^2} (n_1^d n_2^{d-1} \dots n_{d-1}^2 n_d)^k$  subspaces of dimensionality at most  $k$ . We can similarly conclude  $\{(\Pi_{i=d}^1 W_{i,+,y})v : y, v \in \mathcal{S}^{k-1}\} \subseteq V$  where  $V$  is the union of at most  $10^{d^2} (n_1^d n_2^{d-1} \dots n_{d-1}^2 n_d)^k$  subspaces of dimensionality at most  $k$ . Hence applying (52) from Proposition 5 to  $Z = \text{range}(\Pi_{i=d}^1 W_{i,+,x})$ ,  $W = \text{range}(\Pi_{i=d}^1 W_{i,+,y})$ ,  $U$ , and  $V$  gives (2) with probability at least

$$1 - \gamma m^{4k+1} (10^{d^2})^2 (n_1^d n_2^{d-1} \dots n_{d-1}^2 n_d)^{2k} \exp(-\tilde{c}_\epsilon m) \geq 1 - \tilde{\gamma} m^{4k+1} \exp\left(-\frac{\tilde{c}_\epsilon}{2} m\right)$$

provided  $m \geq 2\hat{C}C_\epsilon \tilde{c}_\epsilon^{-1} dk \log(n_1 n_2 \dots n_d) := \tilde{C}_\epsilon dk \log(n_1 n_2 \dots n_d)$ .  $\square$

## 6.1 RRCP Supplementary Results

*Proof of Proposition 3.* Fix  $0 < \epsilon < 1$ . Suppose (37) holds and fix  $x, y \in T$ . Without loss of generality, assume  $x$  and  $y$  are unit normed. We will use the shorthand notation  $\Phi = \Phi_{z,w}$ . Since  $T$  is a subspace,  $x - y \in T$  so by (37),

$$|\langle A_z^\top A_w(x - y), x - y \rangle - \langle \Phi(x - y), x - y \rangle| \leq \epsilon \|x - y\|^2$$

or equivalently

$$\langle \Phi(x - y), x - y \rangle - \epsilon \|x - y\|^2 \leq \langle A_z^\top A_w(x - y), x - y \rangle \leq \langle \Phi(x - y), x - y \rangle + \epsilon \|x - y\|^2. \quad (60)$$

Note that

$$\|x - y\|^2 = 2 - 2\langle x, y \rangle,$$

$$\langle \Phi(x - y), x - y \rangle = \langle \Phi x, x \rangle + \langle \Phi y, y \rangle - 2\langle \Phi x, y \rangle,$$

and

$$\langle A_z^\top A_w(x - y), x - y \rangle = \langle A_z^\top A_w x, x \rangle + \langle A_z^\top A_w y, y \rangle - 2\langle A_z^\top A_w x, y \rangle$$

where we used the fact that  $\Phi$  and  $A_z^\top A_w$  are symmetric. Rearranging (60) yields

$$2(\langle \Phi x, y \rangle - \langle A_z^\top A_w x, y \rangle) \leq (\langle \Phi x, x \rangle - \langle A_z^\top A_w x, x \rangle) + (\langle \Phi y, y \rangle - \langle A_z^\top A_w y, y \rangle) + (2 - 2\langle x, y \rangle)\epsilon.$$

By assumption, the first two terms are bounded from above by  $\epsilon$ . Thus

$$\begin{aligned} 2(\langle \Phi x, y \rangle - \langle A_z^\top A_w x, y \rangle) &\leq 2\epsilon + (2 - 2\langle x, y \rangle)\epsilon \\ &= 2(2 - \langle x, y \rangle)\epsilon \\ &\leq 6\epsilon \end{aligned}$$

so

$$\langle \Phi x, y \rangle - \langle A_z^\top A_w x, y \rangle \leq 3\epsilon.$$

The lower bound is identical. Hence

$$|\langle \Phi x, y \rangle - \langle A_z^\top A_w x, y \rangle| \leq 3\epsilon.$$

□

*Proof of Lemma 7.* It suffices to prove the same upperbound for  $|\{\text{sgn}(Av) : v \in V\}|$ . Let  $\ell = \dim V$ . By rotational invariance of Gaussians, we may take  $V = \text{span}(e_1, \dots, e_\ell)$  without loss of generality. Without loss of generality, we may let  $A$  have dimensions  $m \times \ell$  and take  $V = \mathbb{R}^\ell$ .<sup>7</sup>

We will appeal to a classical result from sphere covering [36]. If  $m$  hyperplanes in  $\mathbb{R}^\ell$  contain the origin and are such that the normal vectors to any subset of  $\ell$  of those hyperplanes are independent, then the complement of the union of these hyperplanes is partitioned into at most

$$2 \sum_{i=0}^{\ell-1} \binom{m-1}{i}$$

disjoint regions. Each region uniquely corresponds to a constant value of  $\text{sgn}(Av)$  that has all non-zero entries. With probability 1, any subset of  $\ell$  rows of  $A$  are linearly independent, and thus,

$$|\{\text{sgn}(Av) : v \in \mathbb{R}^\ell, (Av)_i \neq 0 \forall i\}| \leq 2 \sum_{i=0}^{\ell-1} \binom{m-1}{i} \leq 2\ell \left(\frac{em}{\ell}\right)^\ell \leq 10m^\ell$$

<sup>7</sup>This without loss of generality statement can be deduced by noting the following: if  $v \in V \subset \mathbb{R}^n$  where  $V$  is an  $\ell$ -dimensional subspace, then  $v = Bq$  where  $B \in \mathbb{R}^{n \times n}$  is orthogonal and  $q \in \text{span}(e_1, \dots, e_\ell, 0, \dots, 0)$ . Hence  $Av = \tilde{A}q$  where  $\tilde{A} = AB$  also has i.i.d. Gaussian entries by the rotational invariance of  $A$ . Hence it suffices to consider  $V = \mathbb{R}^\ell$  and  $A \in \mathbb{R}^{m \times \ell}$ .

where the first inequality uses the fact that  $\binom{m}{\ell} \leq (em/\ell)^\ell$  and the second inequality uses that  $2\ell(e/\ell)^\ell \leq 10$  for all  $\ell \geq 1$ .

For arbitrary  $v$ , at most  $\ell$  entries of  $Av$  can be zero by linear independence of the rows of  $A$ . At each  $v$ , there exists a direction  $\tilde{v}$  such that  $(A(v + \delta\tilde{v}))_i \neq 0$  for all  $i$  and for all  $\delta$  sufficiently small. Hence,  $\text{sgn}(Av)$  differs from one of  $\{\text{sgn}(Av) : v \in \mathbb{R}^\ell, (Av)_i \neq 0 \forall i\}$  by at most  $\ell$  entries. Thus,

$$|\{\text{sgn}(Av) : v \in \mathbb{R}^\ell\}| \leq \binom{m}{\ell} |\{\text{sgn}(Av) : v \in \mathbb{R}^\ell, (Av)_i \neq 0 \forall i\}| \leq m^\ell 10m^\ell = 10m^{2\ell}.$$

□

We now prove the continuity of  $\Phi_{z,w}$  for non-zero  $z, w \in \mathbb{R}^n$ . Recall that

$$\Phi_{z,w} := \frac{\pi - 2\theta_{z,w}}{\pi} I_n + \frac{2 \sin \theta_{z,w}}{\pi} M_{\hat{z} \leftrightarrow \hat{w}}$$

where  $\theta_{z,w} := \angle(z, w)$  and  $M_{\hat{z} \leftrightarrow \hat{w}}$  is the matrix that sends  $\hat{z} \mapsto e_1$ ,  $\hat{w} \mapsto \cos \theta_{z,w} e_1 + \sin \theta_{z,w} e_2$ , and  $h \mapsto 0$  for all  $h \in \text{span}(\{z, w\}^\perp)$ .

**Lemma 9** (Continuity of  $\Phi_{z,w}$ ). *Fix  $0 < \epsilon < 1$  and  $z, w \in \mathcal{S}^{n-1}$ . Then if  $\|\tilde{z} - z\| \leq \epsilon$  and  $\|\tilde{w} - w\| \leq \epsilon$  for some  $\tilde{z}, \tilde{w} \in \mathcal{S}^{n-1}$ , we have*

$$\|\Phi_{\tilde{z}, \tilde{w}} - \Phi_{z,w}\| \leq \frac{88}{\pi} \epsilon.$$

*Proof of Lemma 9.* In this proof, we will utilize the following three inequalities:

$$|\theta_{x_1,y} - \theta_{x_2,y}| \leq |\theta_{x_1,x_2}|, \forall x_1, x_2, y \in \mathcal{S}^{n-1} \quad (61)$$

$$2 \sin(\theta_{x,y}/2) \leq \|x - y\|, \forall x, y \in \mathcal{S}^{n-1} \quad (62)$$

$$\theta/4 \leq \sin(\theta/2), \forall \theta \in [0, \pi]. \quad (63)$$

Observe that

$$\|\Phi_{\tilde{z}, \tilde{w}} - \Phi_{z,w}\| \leq \frac{2|\theta_{\tilde{z}, \tilde{w}} - \theta_{z,w}|}{\pi} \|I_n\| + \left\| \frac{2 \sin \theta_{\tilde{z}, \tilde{w}}}{\pi} M_{\tilde{z} \leftrightarrow \tilde{w}} - \frac{2 \sin \theta_{z,w}}{\pi} M_{z \leftrightarrow w} \right\|.$$

First, observe that by (61), we have that

$$\begin{aligned} |\theta_{\tilde{z}, \tilde{w}} - \theta_{z,w}| &\leq |\theta_{\tilde{z}, \tilde{w}} - \theta_{z, \tilde{w}}| + |\theta_{z, \tilde{w}} - \theta_{z,w}| \\ &\leq |\theta_{\tilde{z}, z}| + |\theta_{\tilde{w}, w}|. \end{aligned}$$

Then, by (62) and (63), we have that

$$|\theta_{\tilde{z}, z}| \leq 4 \sin(\theta_{\tilde{z}, z}/2) \leq 2\|\tilde{z} - z\| \leq 2\epsilon.$$

The same upper bound holds for  $|\theta_{\tilde{w}, w}|$ . Thus we attain

$$|\theta_{\tilde{z}, \tilde{w}} - \theta_{z,w}| \leq |\theta_{\tilde{z}, z}| + |\theta_{\tilde{w}, w}| \leq 4\epsilon. \quad (64)$$

Let  $R$  be a rotation matrix that maps  $z \mapsto e_1$  and  $w \mapsto \cos \theta_{z,w} e_1 + \sin \theta_{z,w} e_2$ . Let  $\tilde{R}$  denote the matrix that applies the same rotation to the system  $\tilde{z}$  and  $\tilde{w}$ . Recall that  $M_{z \leftrightarrow w} := R^\top D R$  and  $M_{\tilde{z} \leftrightarrow \tilde{w}} := \tilde{R}^\top \tilde{D} \tilde{R}$  where

$$D := \begin{bmatrix} \cos \theta_{z,w} & \sin \theta_{z,w} & 0 \\ \sin \theta_{z,w} & -\cos \theta_{z,w} & 0 \\ 0 & 0 & 0_{k-2} \end{bmatrix} \text{ and } \tilde{D} := \begin{bmatrix} \cos \theta_{\tilde{z}, \tilde{w}} & \sin \theta_{\tilde{z}, \tilde{w}} & 0 \\ \sin \theta_{\tilde{z}, \tilde{w}} & -\cos \theta_{\tilde{z}, \tilde{w}} & 0 \\ 0 & 0 & 0_{k-2} \end{bmatrix}.$$

An elementary calculation shows that  $D$  has 2 pairs of non-zero eigenvalues and eigenvectors  $(\lambda_1, d_1)$  and  $(\lambda_2, d_2)$  where

$$\lambda_1 = -1 \text{ and } d_1 = (\cos \theta_{z,w} - 1)e_1 + \sin \theta_{z,w} e_2$$

while

$$\lambda_2 = 1 \text{ and } d_2 = (\cos \theta_{z,w} + 1)e_1 + \sin \theta_{z,w} e_2.$$

Let  $D = -d_1 d_1^\top + d_2 d_2^\top$  be the eigenvalue decomposition for  $D$ . Then by the definition of  $M_{z \leftrightarrow w}$ ,

$$\begin{aligned} M_{z \leftrightarrow w} &= R^\top D R \\ &= R^\top (-d_1 d_1^\top + d_2 d_2^\top) R \\ &= -R^\top d_1 d_1^\top R + R^\top d_2 d_2^\top R \\ &:= -v_1 v_1^\top + v_2 v_2^\top \end{aligned}$$

so  $v_1 = R^\top d_1$  and  $v_2 = R^\top d_2$  are the eigenvectors of  $M_{z \leftrightarrow w}$  with corresponding eigenvalues  $-1$  and  $1$ , respectively. Then, recall that  $Rz = e_1$  while  $Rw = \cos \theta_{z,w} e_1 + \sin \theta_{z,w} e_2$ . Thus the eigenvectors  $d_1$  and  $d_2$  can be written as

$$d_1 = Rw - Rz \text{ and } d_2 = Rw + Rz.$$

Thus the eigenvectors of  $M_{z \leftrightarrow w}$  are precisely

$$v_1 = w - z \text{ and } v_2 = w + z.$$

By the same argument, the eigenvectors of  $M_{\tilde{z} \leftrightarrow \tilde{w}}$  are

$$\tilde{v}_1 = \tilde{w} - \tilde{z} \text{ and } \tilde{v}_2 = \tilde{w} + \tilde{z}$$

with corresponding eigenvalues  $-1$  and  $1$ , respectively. Hence, we have that

$$\begin{aligned} \frac{2 \sin \theta_{z,w}}{\pi} M_{z \leftrightarrow w} &= \frac{2 \sin \theta_{z,w}}{\pi} (-v_1 v_1^\top + v_2 v_2^\top) \\ &= \frac{2 \sin \theta_{z,w}}{\pi} (-(w - z)(w - z)^\top + (w + z)(w + z)^\top) \end{aligned}$$

and likewise

$$\frac{2 \sin \theta_{\tilde{z},\tilde{w}}}{\pi} M_{\tilde{z} \leftrightarrow \tilde{w}} = \frac{2 \sin \theta_{\tilde{z},\tilde{w}}}{\pi} (-(\tilde{w} - \tilde{z})(\tilde{w} - \tilde{z})^\top + (\tilde{w} + \tilde{z})(\tilde{w} + \tilde{z})^\top).$$

For simplicity of notation, let  $h = w - z$ ,  $\tilde{h} = \tilde{w} - \tilde{z}$ ,  $g = w + z$ , and  $\tilde{g} = \tilde{w} + \tilde{z}$ . Then

$$\begin{aligned} \left\| \frac{2 \sin \theta_{z,w}}{\pi} M_{z \leftrightarrow w} - \frac{2 \sin \theta_{\tilde{z},\tilde{w}}}{\pi} M_{\tilde{z} \leftrightarrow \tilde{w}} \right\| &= \frac{2}{\pi} \left\| \sin \theta_{z,w} (-hh^\top + gg^\top) + \sin \theta_{\tilde{z},\tilde{w}} (\tilde{h}\tilde{h}^\top - \tilde{g}\tilde{g}^\top) \right\| \\ &\leq \frac{2}{\pi} \left( \left\| \sin \theta_{z,w} hh^\top - \sin \theta_{\tilde{z},\tilde{w}} \tilde{h}\tilde{h}^\top \right\| + \left\| \sin \theta_{z,w} gg^\top - \sin \theta_{\tilde{z},\tilde{w}} \tilde{g}\tilde{g}^\top \right\| \right). \end{aligned}$$

Note that since  $z, w, \tilde{z}, \tilde{w} \in \mathcal{S}^{n-1}$ ,  $\|h\|, \|\tilde{h}\|, \|g\|, \|\tilde{g}\| \leq 2$ . In addition,

$$\|h - \tilde{h}\| \leq \|z - \tilde{z}\| + \|w - \tilde{w}\| \leq 2\epsilon$$

and (64) implies

$$|\sin \theta_{z,w} - \sin \theta_{\tilde{z},\tilde{w}}| \leq |\theta_{z,w} - \theta_{\tilde{z},\tilde{w}}| \leq 4\epsilon.$$

Hence

$$\begin{aligned} \left\| \sin \theta_{z,w} hh^\top - \sin \theta_{\tilde{z},\tilde{w}} \tilde{h}\tilde{h}^\top \right\| &\leq \left\| \sin \theta_{z,w} hh^\top - \sin \theta_{z,w} \tilde{h}\tilde{h}^\top \right\| + \left\| \sin \theta_{z,w} \tilde{h}\tilde{h}^\top - \sin \theta_{\tilde{z},\tilde{w}} \tilde{h}\tilde{h}^\top \right\| \\ &\quad + \left\| \sin \theta_{z,w} \tilde{h}\tilde{h}^\top - \sin \theta_{\tilde{z},\tilde{w}} \tilde{h}\tilde{h}^\top \right\| \\ &\leq |\sin \theta_{z,w}| \|h\| \|h - \tilde{h}\| + |\sin \theta_{z,w}| \|\tilde{h}\| \|h - \tilde{h}\| + \|\tilde{h}\tilde{h}^\top\| |\sin \theta_{z,w} - \sin \theta_{\tilde{z},\tilde{w}}| \\ &\leq 20\epsilon. \end{aligned}$$

The same bound holds for  $\left\| \sin \theta_{z,w} gg^\top - \sin \theta_{\tilde{z},\tilde{w}} \tilde{g}\tilde{g}^\top \right\|$ . Hence we attain

$$\left\| \frac{2 \sin \theta_{z,w}}{\pi} M_{z \leftrightarrow w} - \frac{2 \sin \theta_{\tilde{z},\tilde{w}}}{\pi} M_{\tilde{z} \leftrightarrow \tilde{w}} \right\| \leq \frac{80}{\pi} \epsilon. \quad (65)$$

Combining (64) and (65), we see that

$$\|\Phi_{\tilde{z},\tilde{w}} - \Phi_{z,w}\| \leq \frac{2|\theta_{\tilde{z},\tilde{w}} - \theta_{z,w}|}{\pi} \|I_n\| + \left\| \frac{2 \sin \theta_{\tilde{z},\tilde{w}}}{\pi} M_{\tilde{z} \leftrightarrow \tilde{w}} - \frac{2 \sin \theta_{z,w}}{\pi} M_{z \leftrightarrow w} \right\| \leq \frac{88}{\pi} \epsilon.$$

□

We prove the inequalities used in the above proof:

*Proof of equations (61), (62), and (63).* For (61), we proceed similarly to the proof on page 12 of [12]. Observe that we can write

$$x_1 = \cos \theta_{x_1, y} y + \sin \theta_{x_1, y} y_1^\perp$$

and

$$x_2 = \cos \theta_{x_2, y} y + \sin \theta_{x_2, y} y_2^\perp$$

where  $y_1^\perp$  and  $y_2^\perp$  are unit vectors that are orthogonal to  $y$ . Then observe that

$$\begin{aligned} \langle x_1, x_2 \rangle &= \langle \cos \theta_{x_1, y} y + \sin \theta_{x_1, y} y_1^\perp, \cos \theta_{x_2, y} y + \sin \theta_{x_2, y} y_2^\perp \rangle \\ &= \cos \theta_{x_1, y} \cos \theta_{x_2, y} + \sin \theta_{x_1, y} \sin \theta_{x_2, y} \langle y_1^\perp, y_2^\perp \rangle. \end{aligned}$$

Since  $\theta_{x_1, y}, \theta_{x_2, y} \in [0, \pi]$ , we have that  $\sin \theta_{x_1, y} \sin \theta_{x_2, y} \geq 0$ . In addition,  $\langle y_1^\perp, y_2^\perp \rangle \leq \|y_1^\perp\| \|y_2^\perp\| = 1$  so we attain

$$\langle x_1, x_2 \rangle \leq \cos \theta_{x_1, y} \cos \theta_{x_2, y} + \sin \theta_{x_1, y} \sin \theta_{x_2, y} = \cos(\theta_{x_1, y} - \theta_{x_2, y})$$

by the trigonometric identity  $\cos(\alpha \mp \beta) = \cos \alpha \cos \beta \pm \sin \alpha \sin \beta$ . Since the function  $\cos^{-1}(\cdot)$  is decreasing on  $[-1, 1]$ , we see that

$$\theta_{x_1, y} - \theta_{x_2, y} \leq \cos^{-1}(\langle x_1, x_2 \rangle) = \theta_{x_1, x_2}.$$

Similarly,  $\theta_{x_2, y} - \theta_{x_1, y} \leq \theta_{x_1, x_2}$  so we attain  $|\theta_{x_1, y} - \theta_{x_2, y}| \leq |\theta_{x_1, x_2}|$ .

For (62), observe that

$$\begin{aligned} \|x - y\|^2 &= \|x\|^2 + \|y\|^2 - 2\langle x, y \rangle \\ &= \|x\|^2 + \|y\|^2 - 2\|x\|\|y\| \cos \theta_{x, y} \\ &= 2(1 - \cos \theta_{x, y}). \end{aligned}$$

Thus, using the half angle formula

$$\sin \frac{\theta}{2} = \operatorname{sgn} \left( 2\pi - \theta + 4\pi \left\lfloor \frac{\theta}{4\pi} \right\rfloor \right) \sqrt{\frac{1 - \cos \theta}{2}}$$

we see that

$$\|x - y\| = \sqrt{2(1 - \cos \theta_{x, y})} = 2\sqrt{\frac{1 - \cos \theta_{x, y}}{2}} \geq 2 \sin \frac{\theta_{x, y}}{2}.$$

For (63), one can note that the function  $\psi(\theta) := 4 \sin \frac{\theta}{2} - \theta$  is positive for all  $\theta \in [0, \pi]$ . □
